# Supplementary material for: Age- and Sex-Dependent Changes of Free Circulating Blood Metabolite and Lipid Abundances, Correlations, and Ratios
Source: PubMed Central journal article supplement — J Gerontol A Biol Sci Med Sci. 2021 Nov 8;77(5):918–26. doi: 10.1093/gerona/glab335 (PMC9071469; doi:10.1093/gerona/glab335), 2021-11-08
Supplement: glab335_suppl_supplementary_tables.pdf [file glab335_suppl_supplementary_tables.pdf]

**Age and sex dependent changes of free circulating blood metabolite and lipid abundances, correlations and ratios**

**Supplementary Tables**

| <b>Molecular features</b>         | <b>Compound CHEBI codes</b> |
|-----------------------------------|-----------------------------|
| Choline                           | 15354                       |
| Creatinine                        | 16737                       |
| $\epsilon$ -Caprolactam           | 28579                       |
| DL-2-Aminooctanoic acid           | 75145                       |
| $\Gamma$ -Caprolactone            | 85235                       |
| L-Proline                         | 17203                       |
| Betaine                           | 17750                       |
| Salicylic acid                    | 16914 15365                 |
| Theobromine                       | 28946                       |
| Creatine                          | 16919                       |
| L-Leucine                         | 15603 18347                 |
| Hypoxanthine                      | 17368                       |
| 3-Pyridylacetic acid trigonelline | 86390 18123                 |
| Stachydrine                       | 35280                       |
| Benzenebutanoic acid              | 41500                       |
| Indole-3-carbinol                 | 24814                       |

|                                                     |             |
|-----------------------------------------------------|-------------|
| Acetaminophen                                       | 46195       |
| 2-Ketohexanoic acid                                 | 17308       |
| S-(4,5-Dihydro-2-methyl-3-furanyl)<br>ethanethioate | 131456      |
| L-Carnitine                                         | 16347       |
| L-Phenylalanine                                     | 17295       |
| Uric acid                                           | 17775       |
| Indoleacetic acid                                   | 16411       |
| Paraxanthine Theophylline                           | 25858 28177 |
| L-Tyrosine o-Tyrosine                               | 17895 89461 |
| Naproxen                                            | 7476        |
| L-Tryptophan                                        | 16828       |
| 3-Indolepropionic acid                              | 43580       |
| 1,3,7-Trimethyluric acid                            | 691622      |
| Caffeine                                            | 27732       |
| Hippuric acid                                       | 18089       |
| L-Acetylcarnitine                                   | 57589       |
| Indolelactic acid                                   | 24813       |
| Pantothenic acid                                    | 7916        |
| Flavone                                             | 42491       |

|                                            |             |
|--------------------------------------------|-------------|
| Butyryl-L-carnitine Isobutyryl-L-carnitine | 21949 84838 |
| Geranyl acetoacetate                       | 85255       |
| Dodecanedioic acid                         | 4676        |
| 5a-Androst-3-en-17-one                     | 86393       |
| Propranolol                                | 8499        |
| $\gamma$ -Glutamyl-leucine                 | 68433       |
| Myristic acid                              | 28875       |
| $\alpha$ -Linolenic acid                   | 27432       |
| L-Aspartyl-L-phenylalanine                 | 73830       |
| Pentadecanoic acid                         | 42504       |
| D-erythro-sphingosine                      | 46964       |
| Oleamide                                   | 116314      |
| Piperine                                   | 28821       |
| L-Octanoylcarnitine                        | 18102       |
| Palmitoleic acid                           | 28716       |
| 2,6 dimethylheptanoyl carnitine            | 84095       |
| 4-Androsten-11 $\beta$ -ol-3,17-dione      | 27967 27967 |
| Arachidonic acid                           | 15843       |
| Heptadecanoic acid                         | 32365       |

|                                                            |             |
|------------------------------------------------------------|-------------|
| Phenylalanylphenylalanine                                  | 72723       |
| Decanoyl-L-carnitine                                       | 28717       |
| Fatty acid C20:5 methyl ester                              | 91031       |
| Linoleic acid                                              | 17351       |
| Arachidonic acid methyl ester                              | 78033       |
| MAG(14:0)                                                  | 87249       |
| 10-nitro-9E-octadecenoic acid 9-nitro-9E-octadecenoic acid | 86285 86329 |
| Fatty acid C22:6                                           | 36005       |
| 4,8 dimethylnonanoyl carnitine                             | 63874       |
| Arachidonic acid ethyl ester                               | 84873       |
| MAG(18:0)                                                  | 87255       |
| C12 Carnitine                                              | 73054       |
| Corticosterone                                             | 16827       |
| MAG(16:1)                                                  | 87253       |
| MAG(16:0)                                                  | 87251       |
| MAG(18:3)                                                  | 87258       |
| Treprostinil                                               | 50861       |
| Prostaglandin J2                                           | 27485       |
| Hyodeoxycholic acid                                        | 52023       |

|                                                                        |             |
|------------------------------------------------------------------------|-------------|
| Deoxycholic acid                                                       | 28834       |
| Cortisol                                                               | 17650       |
| 6-hydroxy-5-cholestanol cholesterol                                    | 16113       |
| cis-5-Tetradecenoylcarnitine                                           | 73060       |
| Cholic acid                                                            | 16359       |
| MAG(18:2)                                                              | 87257       |
| MAG(18:1)                                                              | 87256       |
| Stearic acid                                                           | 28842       |
| MAG(20:5)                                                              | 86397       |
| C16 Carnitine                                                          | 73067       |
| 7-Ketocholesterol                                                      | 64294       |
| 17-phenyl trinor Prostaglandin E2 17-phenyl<br>trinor Prostaglandin D2 | 87820 87821 |
| sodium glycochenodeoxycholate                                          | 87818       |
| Deoxycholic acid glycine conjugate                                     | 27471       |
| Chenodeoxycholic acid                                                  | 16755       |
| Linoleyl carnitine                                                     | 73072       |
| Oleoyl-L-carnitine hydrochloride                                       | 91318       |
| A-Tocopherol                                                           | 22470       |
| 3a,6b,7b-Trihydroxy-5b-cholanoic acid                                  | 81298       |

|                                                       |              |
|-------------------------------------------------------|--------------|
| Barogenin                                             | 86509        |
| Γ-Tocopherol                                          | 18185        |
| Dodecanoic acid                                       | 30805        |
| dehydroepiandrosterone sulfate                        | 91028        |
| LPE(16:0)                                             | 90452        |
| 1-palmitoyl-2-hydroxy-sn-glycero-3-PE                 | 73134        |
| GCA                                                   | 17687        |
| 1-O-1'-(Z)-octadecenyl-2-hydroxy-sn-glycero-3-PE      | 87823        |
| LPE(18:2)                                             | 91296        |
| PC(15:2/0:0) PE(18:2/0:0)                             | 131590 91296 |
| LPE(18:1)                                             | 64575        |
| 1-oleoyl-2-hydroxy-sn-glycero-3-PE                    | 75168        |
| LPE(18:0)                                             | 64576        |
| 1-Stearoyl-2-Hydroxy-sn-Glycero-3-PE                  | 83047        |
| 2a-(3-Hydroxypropyl)-1a,25-dihydroxy-19-norvitamin D3 | 91006        |
| PC(37:5) PE(40:5)                                     | 85767 71745  |
| LPC(0:0/16:1)                                         | 91298        |
| LPC(16:1/0:0)                                         | 91305        |

|                                       |             |
|---------------------------------------|-------------|
| LPC(0:0/16:0)                         | 91297       |
| 1-palmitoyl-2-hydroxy-sn-glycero-3-PC | 72998       |
| LPE(20:4)                             | 64569       |
| PC(O-18:1/0:0) PC(P-18:0/0:0)         | 64591 88779 |
| LPC(18e:0/0:0)                        | 75216       |
| Lyso-PAF C-18                         | 91144       |
| PS(18:0)                              | 131443      |
| LPC(18:3)                             | 64565       |
| LPC(0:0/18:2)                         | 91302       |
| LPC(18:2/0:0)                         | 91309       |
| LPC(18:1)                             | 64566       |
| 1-oleoyl-2-hydroxy-sn-glycero-3-PC    | 28610       |
| LPC(0:0/18:0)                         | 91299       |
| 1-stearoyl-2-hydroxy-sn-glycero-3-PC  | 73858       |
| LPC(0:0/20:4)                         | 91303       |
| LPC(20:4/0:0)                         | 91310       |
| LPC(20:3)                             | 64481       |
| LPC(20:4)                             | 64481       |
| LPC(20:2)                             | 67056       |

|                                        |             |
|----------------------------------------|-------------|
| LPC(20:1)                              | 67057       |
| 3-cis-Hydroxy-b,e-Caroten-3'-one       | HMDB02890   |
| Palmitic acid                          | 15756       |
| 1-arachidoyl-2-hydroxy-sn-glycero-3-PC | 74968       |
| LPC(0:0/20:5)                          | 91304       |
| LPC(20:5/0:0)                          | 91311       |
| LPC(22:7)                              | 74349       |
| LPC(22:6)                              | 74349       |
| LPC(22:5)                              | 74349       |
| LPC(22:4)                              | 91312       |
| Biliverdin hydrochloride b             | 91027       |
| Biliverdin hydrochloride a             | 91027       |
| Bilirubin I                            | 16990       |
| Bilirubin II                           | 16990       |
| D-Urobilinogen I-Urobilin              | 4260 36378  |
| cis/trans-Oleic acid                   | 36021       |
| 1-linoleoyl-2-stearoyl-sn-glycerol     | 86337       |
| 1-vaccenoyl-2-palmitoyl-sn-glycerol    | 86346       |
| Ceramide PE(33:1) SPM(30:1)            | 86515 72505 |



|                                                   |             |
|---------------------------------------------------|-------------|
| Ceramide PE(34:1)                                 | 86517       |
| Ceramide PE(35:2) SPM(32:2)                       | 86523 72510 |
| PC(28:2)                                          | 65292       |
| Ceramide PE(35:1) SPM(32:1)                       | 86519 64586 |
| PC(28:1)                                          | 65293       |
| Ceramide PE(36:2)                                 | 86525       |
| PC(29:1)                                          | 131438      |
| Ornithine                                         | 18257       |
| Ceramide PE(37:2) SPM(34:2)                       | 86527 64587 |
| PC(30:2)                                          | 65301       |
| N-palmitoyl-D-erythro-sphingosylphosphorylcholine | 78646       |
| PC(30:1)                                          | 65302       |
| Ceramide PE(38:2)                                 | 86968       |
| SPM(d18:2/18:1)                                   | 105799      |
| N-(9Z-octadecenoyl)-sphing-4-enine-1-PC           | 84487       |
| 1,2-dipalmitoleoyl-sn-glycero-3-PC                | 83717       |
| N-(octadecanoyl)-sphing-4-enine-1-PC              | 83358       |
| PC(32:1)                                          | 66849       |
| 1,2-dipalmitoyl-sn-glycero-3-PC                   | 72999       |

|                                                           |              |
|-----------------------------------------------------------|--------------|
| 1,2-dilinoleoyl-sn-glycero-3-PC                           | 42027        |
| PC(33:1) PE(36:1)                                         | 86472 71727  |
| PC(34:5) PE(37:5)                                         | 66854 131584 |
| PC(34:4)                                                  | 64423        |
| PC(34:3)                                                  | 64424        |
| PC(34:2) PE(37:2)                                         | 64516 131583 |
| 1-oleoyl-2-palmitoyl-sn-glycero-3-PC                      | 74667        |
| PC(34:0)                                                  | 66855        |
| C16-20:5 PC                                               | unknown      |
| PC(35:4) PE(38:4)                                         | 91322 71737  |
| 1-stearoyl-2-arachidonoyl-sn-glycero-3-<br>PE C15-20:4 PC | 79110 86344  |
| PC(35:3) PE(38:3)                                         | 131439 71736 |
| PC(35:2) PE(38:2)                                         | 85766 71735  |
| PC(34:3) PE(37:3)                                         | 64424 131581 |
| PC(36:6)                                                  | 66856        |
| PC(36:5)                                                  | 64504        |
| 1,2-dilinoleoyl-sn-glycero-4-PC                           | 42027        |
| PC(36:3) PE(39:3)                                         | 64523 131585 |
| SPM(40:2)                                                 | 72529        |

|                                                                  |              |
|------------------------------------------------------------------|--------------|
| 1,2-dioleoyl-sn-glycero-3-PC 1,2-dipetroselenoyl-sn-glycero-3-PC | 74669 86330  |
| PC(36:1)                                                         | 66857        |
| SPM(41:2)                                                        | 85762        |
| PC(38:7)                                                         | 64498        |
| 1-palmitoyl-2-docosahexaenoyl-sn-glycero-3-PC                    | 74963        |
| PC(38:5) PE(41:5)                                                | 64525 131586 |
| PC(38:4)                                                         | 64526        |
| PC(38:3)                                                         | 64446        |
| PC(38:2)                                                         | 66859        |
| N-(15Z-tetracosenoyl)-sphinganine-1-PC                           | 91146        |
| PC(40:6)                                                         | 64431        |
| SPM(42:3)                                                        | 72535        |
| LacCer(d18:1/14:0)                                               | 91034        |
| PC(40:5)                                                         | 64524        |
| PC(42:7)                                                         | 131440       |
| Lactosyl ceramide(d18:1/16:0)                                    | 84758        |

Table S1: List of metabolites and lipids tested and CHEBI codes. Abbreviation: LPC = Lysophosphatidylcholine; LPE = lysophosphatidylethanolamine; PC = phosphatidylcholine; PE =

phosphatidylethanolamine; MAG = monoacylglycerol; GCA = glycocholic acid; SPM = sphingomyelin. See Figure 2 for an overview of the statistical procedure.

| Women ( $n_1=804$ ) |                                   |                         |                                | Men ( $n_2=1078$ ) |                                  |                         |                                |
|---------------------|-----------------------------------|-------------------------|--------------------------------|--------------------|----------------------------------|-------------------------|--------------------------------|
| Group               | Age range<br>(min – max)<br>years | Age<br>mean±sd<br>years | n.<br>individuals<br>per group | Group              | Age range<br>(min- max)<br>years | Age<br>mean±sd<br>years | n.<br>individuals<br>per group |
| W <sub>1</sub>      | 48.4-55.1                         | 51.8±2.1                | 41                             | M <sub>1</sub>     | 47.6-53.8                        | 51.3±1.5                | 54                             |
| W <sub>2</sub>      | 55.1-58.6                         | 57.1±1.1                | 40                             | M <sub>2</sub>     | 53.8-57.8                        | 55.9±1.2                | 54                             |
| W <sub>3</sub>      | 58.6-60.7                         | 59.8±0.6                | 40                             | M <sub>3</sub>     | 57.8-60.2                        | 59.2±0.7                | 54                             |
| W <sub>4</sub>      | 60.7-62.5                         | 61.5±0.5                | 40                             | M <sub>4</sub>     | 60.2-62.7                        | 61.5±0.7                | 54                             |
| W <sub>5</sub>      | 62.5-64.3                         | 63.3±0.5                | 40                             | M <sub>5</sub>     | 62.7-64.4                        | 63.6±0.5                | 54                             |
| W <sub>6</sub>      | 64.3-65.1                         | 64.8±0.2                | 40                             | M <sub>6</sub>     | 64.4-65.2                        | 64.8±0.2                | 55                             |
| W <sub>7</sub>      | 65.1-65.5                         | 65.3±0.1                | 42                             | M <sub>7</sub>     | 65.2-65.8                        | 65.4±0.2                | 52                             |
| W <sub>8</sub>      | 65.5-66.1                         | 65.8±0.2                | 39                             | M <sub>8</sub>     | 65.8-66.4                        | 66.0±0.2                | 54                             |
| W <sub>9</sub>      | 66.1-66.8                         | 66.4±0.2                | 40                             | M <sub>9</sub>     | 66.4-67.5                        | 67.0±0.3                | 54                             |
| W <sub>10</sub>     | 66.8-67.6                         | 67.2±0.2                | 40                             | M <sub>10</sub>    | 67.5-68.6                        | 68.1±0.3                | 54                             |
| W <sub>11</sub>     | 67.6-68.9                         | 68.2±0.4                | 40                             | M <sub>11</sub>    | 68.6-69.7                        | 69.1±0.3                | 54                             |

|                 |           |          |    |                 |           |          |    |
|-----------------|-----------|----------|----|-----------------|-----------|----------|----|
| W <sub>12</sub> | 68.9-69.9 | 69.4±0.3 | 40 | M <sub>12</sub> | 69.7-70.6 | 70.2±0.3 | 54 |
| W <sub>13</sub> | 69.9-70.8 | 70.4±0.3 | 40 | M <sub>13</sub> | 70.6-71.5 | 71.1±0.3 | 54 |
| W <sub>14</sub> | 70.8-72.5 | 71.6±0.5 | 41 | M <sub>14</sub> | 71.5-73.1 | 72.3±0.5 | 53 |
| W <sub>15</sub> | 72.5-74.4 | 73.5±0.5 | 40 | M <sub>15</sub> | 73.1-74.5 | 73.9±0.4 | 54 |
| W <sub>16</sub> | 74.4-76.0 | 75.1±0.4 | 40 | M <sub>16</sub> | 74.5-75.7 | 75.1±0.3 | 54 |
| W <sub>17</sub> | 76.0-77.8 | 76.9±0.5 | 40 | M <sub>17</sub> | 75.7-77.2 | 76.5±0.4 | 54 |
| W <sub>18</sub> | 77.8-80.3 | 78.9±0.7 | 40 | M <sub>18</sub> | 77.2-79.2 | 78.1±0.5 | 54 |
| W <sub>19</sub> | 80.3-84.2 | 82.2±1.1 | 40 | M <sub>19</sub> | 79.2-81.7 | 80.3±0.7 | 54 |
| W <sub>20</sub> | 84.2-93.9 | 87.0±2.4 | 41 | M <sub>20</sub> | 81.7-93.3 | 85.0±2.9 | 54 |

Table S2: Characteristics of the 20 groups resulting from the stratification of subjects by age using the 20 quantiles of the age distribution of women and men. For each group, the number of subjects per group, age-range, and age mean±standard deviation were reported. See figure 1 for a graphical illustration of the stratification procedure.

| Association of abundance of molecular features a with age |                                     |                    |                    |                    |                   |
|-----------------------------------------------------------|-------------------------------------|--------------------|--------------------|--------------------|-------------------|
| Women (n=804)                                             | Molecular features                  | Correlation        | P-value            | P-value adjusted   | Validation (>50%) |
|                                                           | 1. C-16 Carnitine                   | 0.79               | $7 \times 10^{-5}$ | $9 \times 10^{-4}$ | 79                |
|                                                           | 2. Pentadecanoic acid               | 0.58               | $7 \times 10^{-5}$ | $9 \times 10^{-4}$ | 22                |
|                                                           | 3. Palmitic acid                    | 0.55               | $8 \times 10^{-5}$ | $9 \times 10^{-4}$ | 41                |
|                                                           | 4. Oleoyl-L-carnitine hydrochloride | 0.72               | $8 \times 10^{-5}$ | $9 \times 10^{-4}$ | 32                |
|                                                           | 5. Heptadecanoic acid               | 0.67               | $8 \times 10^{-5}$ | $9 \times 10^{-4}$ | 32                |
|                                                           | 6. Myristic acid                    | 0.67               | $9 \times 10^{-5}$ | 0.001              | 34                |
|                                                           | 7. cis/trans-Oleic acid             | 0.67               | $9 \times 10^{-5}$ | 0.001              | 42                |
|                                                           | 8. cis-5-Tetradecenoylcarnitine     | 0.57               | $9 \times 10^{-5}$ | 0.001              | 20                |
|                                                           | 9. Propranolol                      | 0.52               | $1 \times 10^{-4}$ | 0.001              | 10                |
|                                                           | 10. Choline                         | 0.51               | $1 \times 10^{-4}$ | 0.001              | 15                |
|                                                           | 11. Linoleyl carnitine              | 0.50               | $1 \times 10^{-4}$ | 0.001              | 26                |
|                                                           | 12. Corticosterone                  | 0.58               | $2 \times 10^{-4}$ | 0.003              | 44                |
|                                                           | 13. L-Acetylcarnitine               | 0.57               | $2 \times 10^{-4}$ | 0.003              | 36                |
| 14. Dodecanoic acid                                       | 0.57                                | $2 \times 10^{-4}$ | 0.003              | 29                 |                   |

|                                                                |       |                    |       |    |
|----------------------------------------------------------------|-------|--------------------|-------|----|
| 15. 10-nitro-9E-octadecenoic acid 9-nitro-9E-octadecenoic acid | 0.55  | $2 \times 10^{-4}$ | 0.003 | 41 |
| 16. Barogenin                                                  | 0.35  | $3 \times 10^{-4}$ | 0.003 | 37 |
| 17. Dodecanedioic acid                                         | 0.52  | $3 \times 10^{-4}$ | 0.003 | 40 |
| 18. PC(15:2/0:0) PE(18:2/0:0)                                  | 0.52  | $4 \times 10^{-4}$ | 0.003 | 21 |
| 19. LPC(20:1)                                                  | 0.52  | $4 \times 10^{-4}$ | 0.003 | 17 |
| 20. 5a-Androst-3-en-17-one                                     | -0.52 | $4 \times 10^{-4}$ | 0.003 | 30 |
| 21. MAG(16:0)                                                  | 0.42  | $4 \times 10^{-4}$ | 0.003 | 12 |
| 22. 4,8 dimethylnonanoyl carnitine                             | 0.51  | $4 \times 10^{-4}$ | 0.003 | 32 |
| 23. C12 Carnitine                                              | 0.51  | $4 \times 10^{-4}$ | 0.003 | 39 |
| 24. 2a-(3-Hydroxypropyl)-1a,25-dihydroxy-19-norvitamin D3      | 0.51  | $4 \times 10^{-4}$ | 0.003 | 22 |
| 25. gamma-Glutamyl-leucine                                     | 0.50  | $4 \times 10^{-4}$ | 0.003 | 19 |
| 26. 7-Ketocholesterol                                          | 0.49  | $4 \times 10^{-4}$ | 0.003 | 16 |
| 27. 3-Indolepropionic acid                                     | -0.50 | $4 \times 10^{-4}$ | 0.003 | 26 |
| 28. Naproxen                                                   | -0.49 | $4 \times 10^{-4}$ | 0.003 | 23 |
| 29. Ceramide PE(38:2)                                          | 0.57  | $4 \times 10^{-4}$ | 0.003 | 20 |
| 30. Theobromine                                                | 0.47  | $4 \times 10^{-4}$ | 0.003 | 5  |
| 31. Paraxanthine Theophylline                                  | -0.46 | $5 \times 10^{-4}$ | 0.003 | 6  |

|                                           |       |                    |       |    |
|-------------------------------------------|-------|--------------------|-------|----|
| 32. PC(28:1)                              | 0.46  | $5 \times 10^{-4}$ | 0.003 | 11 |
| 33. Ceramide PE(35:1) SPM(32:1)           | 0.46  | $5 \times 10^{-4}$ | 0.003 | 25 |
| 34. Deoxycholic acid glycine conjugate    | 0.45  | $6 \times 10^{-4}$ | 0.003 | 27 |
| 35. Ceramide PE(36:2)                     | 0.44  | $6 \times 10^{-4}$ | 0.003 | 36 |
| 36. MAG(14:0)                             | 0.48  | $7 \times 10^{-4}$ | 0.004 | 28 |
| 37. Uric acid                             | 0.43  | $7 \times 10^{-4}$ | 0.004 | 15 |
| 38. 1-Stearoyl-2-Hydroxy-sn-Glycero-3-PE  | 0.43  | $8 \times 10^{-4}$ | 0.004 | 18 |
| 39. sodium glycochenodeoxycholate         | 0.42  | $8 \times 10^{-4}$ | 0.004 | 22 |
| 40. L-Proline                             | 0.42  | $9 \times 10^{-4}$ | 0.004 | 36 |
| 41. Caffeine                              | -0.41 | $9 \times 10^{-4}$ | 0.004 | 45 |
| 42. Indole-3-carbinol                     | 0.41  | $9 \times 10^{-4}$ | 0.004 | 42 |
| 43. L-Octanoylcarnitine                   | 0.40  | 0.001              | 0.008 | 31 |
| 44. Geranyl acetoacetate                  | 0.40  | 0.001              | 0.008 | 22 |
| 45. L-Leucine L-Norleucine                | 0.40  | 0.001              | 0.008 | 29 |
| 46. SPM(41:2)                             | -0.39 | 0.002              | 0.01  | 37 |
| 47. 1-palmitoyl-2-hydroxy-sn-glycero-3-PE | 0.39  | 0.002              | 0.01  | 42 |



|                                                       |       |       |      |    |
|-------------------------------------------------------|-------|-------|------|----|
| 48. Biliverdin hydrochloride a                        | -0.39 | 0.002 | 0.01 | 24 |
| 49. Linoleic acid                                     | 0.66  | 0.002 | 0.01 | 59 |
| 50. $\alpha$ -Linolenic acid                          | 0.65  | 0.003 | 0.01 | 66 |
| 51. Butyryl-L-carnitine Isobutyryl-L-carnitine        | 0.38  | 0.004 | 0.02 | 23 |
| 52. Cholic acid                                       | 0.38  | 0.004 | 0.02 | 4  |
| 53. Deoxycholic acid                                  | 0.38  | 0.004 | 0.02 | 16 |
| 54. LPC(18e:0/0:0)                                    | 0.38  | 0.005 | 0.02 | 21 |
| 55. LPE(18:1)                                         | 0.38  | 0.005 | 0.02 | 12 |
| 56. LPE(18:2)                                         | 0.38  | 0.005 | 0.02 | 10 |
| 57. PC(30:1)                                          | 0.38  | 0.005 | 0.02 | 37 |
| 58. Creatine                                          | 0.38  | 0.005 | 0.02 | 22 |
| 59. 1,3,7-Trimethyluric acid                          | 0.38  | 0.005 | 0.02 | 6  |
| 60. PC(42:7)                                          | 0.37  | 0.006 | 0.02 | 22 |
| 61. Decanoyl-L-carnitine                              | 0.37  | 0.006 | 0.02 | 15 |
| 62. Stearic acid                                      | 0.37  | 0.007 | 0.02 | 30 |
| 63. Palmitoleic acid                                  | 0.37  | 0.007 | 0.02 | 17 |
| 64. N-palmitoyl-D-erythro-sphingosylphosphorylcholine | 0.36  | 0.007 | 0.02 | 8  |
| 65. Lactosyl ceramide(d18:1/16:0)                     | 0.36  | 0.008 | 0.02 | 19 |

|                                                                         |       |       |      |    |
|-------------------------------------------------------------------------|-------|-------|------|----|
| 66. Treprostinil                                                        | 0.36  | 0.008 | 0.02 | 22 |
| 67. PC(29:1)                                                            | 0.36  | 0.008 | 0.02 | 19 |
| 68. 4-Androsten-11Beta-ol-3,17-dione 11-Hydroxy-4-androstene-3,17-dione | -0.36 | 0.008 | 0.02 | 20 |
| 69. Ceramide PE(37:2) SPM(34:2)                                         | 0.36  | 0.009 | 0.02 | 20 |
| 70. N-(octadecanoyl)-sphing-4-enine-1-PC                                | 0.36  | 0.009 | 0.02 | 2  |
| 71. PC(37:5) PE(40:5)                                                   | 0.35  | 0.009 | 0.02 | 14 |
| 72. Hyodeoxycholic acid                                                 | 0.35  | 0.009 | 0.02 | 12 |
| 73. Pantothenic acid                                                    | 0.34  | 0.009 | 0.02 | 13 |
| 74. 1,4-dipalmitoyl-sn-glycero-3-PC                                     | 0.34  | 0.009 | 0.02 | 12 |
| 75. LPE(16:0)                                                           | 0.34  | 0.009 | 0.02 | 5  |
| 76. MAG(18:0)                                                           | 0.33  | 0.01  | 0.02 | 10 |
| 77. Chenodeoxycholic acid                                               | 0.33  | 0.01  | 0.02 | 11 |
| 78. 2,6 dimethylheptanoyl carnitine                                     | 0.33  | 0.01  | 0.02 | 6  |
| 79. SPM(42:3)                                                           | -0.33 | 0.01  | 0.02 | 2  |
| 80. Fatty acid C22:6                                                    | 0.33  | 0.01  | 0.02 | 2  |

|                                                               |       |      |      |    |
|---------------------------------------------------------------|-------|------|------|----|
| 81. Ornithine                                                 | 0.33  | 0.01 | 0.02 | 1  |
| 82. PC(30:2)                                                  | 0.33  | 0.01 | 0.02 | 16 |
| 83. Ceramide PE(34:1)                                         | 0.31  | 0.01 | 0.02 | 14 |
| 84. N-(15Z-tetracosenoyl)-<br>sphinganine-1-PC                | -0.31 | 0.02 | 0.04 | 13 |
| 85. 1-stearoyl-2-arachidonoyl-sn-<br>glycero-3-PE C15-20:4 PC | -0.31 | 0.02 | 0.04 | 18 |
| 86. LPE(18:0)                                                 | 0.31  | 0.02 | 0.04 | 22 |
| 87. MAG(18:1)                                                 | 0.31  | 0.02 | 0.04 | 29 |
| 88. Lyso-PAF C-18                                             | 0.30  | 0.02 | 0.04 | 22 |
| 89. Prostaglandin J2                                          | -0.30 | 0.02 | 0.04 | 12 |
| 90. LPE(20:4)                                                 | 0.30  | 0.02 | 0.04 | 36 |
| 91. PC(34:3)                                                  | 0.30  | 0.02 | 0.04 | 17 |
| 92. 2-Ketohexanoic acid                                       | -0.28 | 0.02 | 0.04 | 15 |
| 93. DL-2-Aminooctanoic acid                                   | 0.28  | 0.02 | 0.04 | 10 |
| 94. LacCer(d18:1/14:0)                                        | 0.28  | 0.02 | 0.04 | 4  |
| 95. Piperine                                                  | -0.27 | 0.02 | 0.04 | 13 |
| 96. 1,2-dilinoleoyl-sn-glycero-3-<br>PC                       | -0.27 | 0.03 | 0.06 | 2  |
| 97. D-Urobilinogen I-Urobilin                                 | 0.27  | 0.03 | 0.06 | 11 |

|      |                                           |       |      |      |    |
|------|-------------------------------------------|-------|------|------|----|
| 98.  | C16-20:5 PC                               | -0.27 | 0.03 | 0.06 | 2  |
| 99.  | Ceramide PE(33:1) SPM(30:1)               | 0.26  | 0.03 | 0.06 | 12 |
| 100. | D-erythro-sphingosine                     | 0.26  | 0.03 | 0.06 | 26 |
| 101. | 3a,6b,7b-Trihydroxy-<br>5b-cholanoic acid | 0.26  | 0.03 | 0.06 | 29 |
| 102. | LPC(20:4/0:0)                             | -0.25 | 0.04 | 0.08 | 14 |
| 103. | PC(35:3) PE(38:3)                         | 0.25  | 0.04 | 0.08 | 17 |
| 104. | LPC(16:1/0:0)                             | -0.24 | 0.05 | 0.09 | 11 |
| 105. | PC(O-18:1/0:0) PC(P-<br>18:0/0:0)         | 0.24  | 0.05 | 0.09 | 11 |
| 106. | 3-cis-Hydroxy-b,e-<br>Caroten-3'-one      | -0.23 | 0.05 | 0.09 | 3  |
| 107. | PS(18:0)                                  | 0.23  | 0.05 | 0.09 | 5  |
| 108. | Acetaminophen                             | 0.23  | 0.05 | 0.09 | 19 |
| 109. | LPC(0:0/16:0)                             | 0.23  | 0.05 | 0.09 | 2  |
| 110. | Arachidonic acid                          | 0.22  | 0.05 | 0.09 | 17 |
| 111. | Bilirubin I                               | -0.22 | 0.05 | 0.09 | 25 |
| 112. | Cortisol                                  | 0.22  | 0.05 | 0.09 | 12 |
| 113. | MAG(18:3)                                 | 0.22  | 0.05 | 0.09 | 1  |
| 114. | Glycocholic acid                          | 0.22  | 0.05 | 0.09 | 1  |

|      |                                            |       |      |      |    |
|------|--------------------------------------------|-------|------|------|----|
| 115. | LPC(20:3)                                  | 0.22  | 0.05 | 0.09 | 3  |
| 116. | Indolelactic acid                          | 0.22  | 0.06 | 0.10 | 5  |
| 117. | PC(38:7)                                   | -0.22 | 0.06 | 0.10 | 5  |
| 118. | 1-palmitoyl-2-hydroxy-<br>sn-glycero-3-PC  | 0.21  | 0.06 | 0.10 | 1  |
| 119. | Hippuric acid                              | 0.21  | 0.07 | 0.12 | 1  |
| 120. | MAG(20:5)                                  | 0.21  | 0.07 | 0.12 | 1  |
| 121. | 1,3-dipalmitoleoyl-sn-<br>glycero-3-PC     | 0.21  | 0.08 | 0.13 | 15 |
| 122. | Bilirubin II                               | -0.21 | 0.08 | 0.13 | 26 |
| 123. | 3-Pyridylacetic<br>acid trigonelline       | -0.20 | 0.09 | 0.14 | 4  |
| 124. | PC(38:4)                                   | -0.20 | 0.09 | 0.14 | 6  |
| 125. | Gamma-Tocopherol                           | 0.20  | 0.09 | 0.14 | 12 |
| 126. | MAG(18:2)                                  | 0.20  | 0.09 | 0.14 | 14 |
| 127. | 1-arachidoyl-2-<br>hydroxy-sn-glycero-3-PC | 0.20  | 0.10 | 0.16 | 14 |
| 128. | PC(34:4)                                   | -0.20 | 0.10 | 0.16 | 2  |
| 129. | PC(36:5)                                   | -0.19 | 0.10 | 0.16 | 2  |
| 130. | Creatinine                                 | 0.19  | 0.10 | 0.16 | 3  |

|      |                                                         |          |      |      |    |
|------|---------------------------------------------------------|----------|------|------|----|
| 131. | N-(9Z-octadecenoyl)-<br>sphing-4-enine-1-PC             | 0.19     | 0.11 | 0.17 | 15 |
| 132. | S-(4,5-Dihydro-2-<br>methyl-3-furanyl)<br>ethanethioate | -0.18    | 0.11 | 0.17 | 2  |
| 133. | SPM(d18:2/18:1)                                         | 0.18     | 0.11 | 0.17 | 15 |
| 134. | LPC(0:0/16:1)                                           | -0.17    | 0.12 | 0.18 | 9  |
| 135. | 6-hydroxy-5-<br>cholestanol cholesterol                 | -0.17    | 0.12 | 0.18 | 10 |
| 136. | LPC(20:3)                                               | 0.17     | 0.12 | 0.18 | 13 |
| 137. | Alpha-Tocopherol                                        | -0.17    | 0.13 | 0.19 | 14 |
| 138. | SPM(40:2)                                               | -0.17    | 0.13 | 0.19 | 16 |
| 139. | LPC(18:3)                                               | 0,164388 | 0.13 | 0.19 | 2  |
| 140. | 1,2-dilinoleoyl-sn-<br>glycero-3-PC                     | 0,161861 | 0.14 | 0.20 | 4  |
| 141. | PC(38:2)                                                | -0.16    | 0.14 | 0.20 | 5  |
| 142. | LPC(0:0/20:4)                                           | -0.16    | 0.15 | 0.21 | 13 |
| 143. | 1-palmitoyl-2-<br>docosahexaenoyl-sn-glycero-3-<br>PC   | 0.16     | 0.15 | 0.21 | 21 |
| 144. | PC(36:1)                                                | -0.15    | 0.16 | 0.22 | 12 |

|      |                                                                  |       |      |      |    |
|------|------------------------------------------------------------------|-------|------|------|----|
| 145. | Arachidonic acid ethyl ester                                     | 0.15  | 0.16 | 0.22 | 10 |
| 146. | 1-stearoyl-2-hydroxy-sn-glycero-3-PC                             | 0.14  | 0.17 | 0.23 | 8  |
| 147. | Oleamide                                                         | 0.14  | 0.17 | 0.23 | 9  |
| 148. | PC(35:2) PE(38:2)                                                | 0.14  | 0.17 | 0.23 | 9  |
| 149. | 1-vaccenoyl-2-palmitoyl-sn-glycerol                              | 0.14  | 0.18 | 0.24 | 7  |
| 150. | 1,2-dioleoyl-sn-glycero-3-PC 1,2-dipetroselenoyl-sn-glycero-3-PC | -0.13 | 0.19 | 0.25 | 5  |
| 151. | Arachidonic acid methyl ester                                    | -0.13 | 0.19 | 0.25 | 10 |
| 152. | LPC(0:0/18:0)                                                    | 0.13  | 0.20 | 0.26 | 10 |
| 153. | LPC(22:4)                                                        | -0.12 | 0.20 | 0.26 | 12 |
| 154. | PC(34:3) PE(37:3)                                                | -0.12 | 0.20 | 0.26 | 4  |
| 155. | PC(33:1) PE(36:1)                                                | 0.12  | 0.21 | 0.27 | 2  |
| 156. | MAG(16:1)                                                        | 0.11  | 0.21 | 0.27 | 1  |
| 157. | Indoleacetic acid                                                | 0.10  | 0.25 | 0.32 | 2  |
| 158. | PC(40:6)                                                         | 0.10  | 0.25 | 0.32 | 15 |

|      |                                                                           |       |      |      |    |
|------|---------------------------------------------------------------------------|-------|------|------|----|
| 159. | Hypoxanthine                                                              | -0.11 | 0.25 | 0.32 | 1  |
| 160. | 1-O-1'-(Z)-octadecenyl-<br>2-hydroxy-sn-glycero-3-PE                      | 0.20  | 0.27 | 0.34 | 1  |
| 161. | LPC(20:2)                                                                 | 0.20  | 0.27 | 0.34 | 14 |
| 162. | PC(38:5) PE(41:5)                                                         | -0.19 | 0.33 | 0.41 | 6  |
| 163. | Flavone                                                                   | -0.18 | 0.35 | 0.43 | 4  |
| 164. | L-Tryptophan                                                              | 0.19  | 0.35 | 0.43 | 4  |
| 165. | 17-phenyl trinor<br>Prostaglandin E2 17-phenyl<br>trinor Prostaglandin D2 | 0.18  | 0.35 | 0.43 | 10 |
| 166. | PC(32:1)                                                                  | 0.18  | 0.35 | 0.43 | 5  |
| 167. | LPC (22:5)                                                                | -0.18 | 0.38 | 0.46 | 5  |
| 168. | $\epsilon$ -Caprolactam                                                   | 0.18  | 0.39 | 0.47 | 9  |
| 169. | L-Phenylalanine                                                           | -0.17 | 0.40 | 0.48 | 2  |
| 170. | Benzenebutanoic acid                                                      | 0.16  | 0.40 | 0.48 | 10 |
| 171. | Salicylic acid Aspirin                                                    | 0.16  | 0.41 | 0.48 | 1  |
| 172. | Phenylalanine                                                             | 0.16  | 0.43 | 0.51 | 15 |
| 173. | Stachydrine                                                               | -0.15 | 0.45 | 0.52 | 13 |
| 174. | dehydroepiandrosterone<br>sulfate                                         | 0.10  | 0.45 | 0.52 | 2  |



|      |                                      |       |      |      |    |
|------|--------------------------------------|-------|------|------|----|
| 175. | LPC(22:5)                            | 0.17  | 0.50 | 0.58 | 1  |
| 176. | LPC(20:5/0:0)                        | 0.10  | 0.55 | 0.63 | 0  |
| 177. | PC(36:6)                             | 0.14  | 0.58 | 0.66 | 1  |
| 178. | 1-oleoyl-2-hydroxy-sn-glycero-3-PC   | 0.17  | 0.59 | 0.67 | 6  |
| 179. | $\gamma$ -Caprolactone               | 0.14  | 0.62 | 0.70 | 6  |
| 180. | L-Carnitine                          | 0.11  | 0.63 | 0.70 | 8  |
| 181. | PC(36:3) PE(39:3)                    | -0.29 | 0.73 | 0.81 | 6  |
| 182. | 1-oleoyl-2-hydroxy-sn-glycero-3-PE   | 0.29  | 0.74 | 0.82 | 1  |
| 183. | LPC (18:1)                           | 0.29  | 0.77 | 0.85 | 10 |
| 184. | 1-oleoyl-2-palmitoyl-sn-glycero-3-PC | -0.29 | 0.78 | 0.86 | 3  |
| 185. | L-Tyrosine o-Tyrosine                | 0.28  | 0.79 | 0.86 | 2  |
| 186. | PC(34:2) PE(37:2)                    | -0.11 | 0.80 | 0.87 | 1  |
| 187. | Betaine                              | -0.10 | 0.82 | 0.88 | 13 |
| 188. | PC(34:5) PE(37:5)                    | 0.17  | 0.84 | 0.90 | 12 |
| 189. | 1-linoleoyl-2-stearoyl-sn-glycerol   | -0.15 | 0.85 | 0.90 | 14 |
| 190. | PC(34:0)                             | -0.15 | 0.85 | 0.90 | 7  |

|                                 |                                       |       |                    |       |    |
|---------------------------------|---------------------------------------|-------|--------------------|-------|----|
|                                 | 191. L-Aspartyl-L-phenylalanine       | 0.13  | 0.85               | 0.90  | 1  |
|                                 | 192. LPC(0:0/20:5)                    | 0.16  | 0.86               | 0.91  | 1  |
|                                 | 193. LPC(0:0/18:2)                    | -0.14 | 0.8                | 0.91  | 12 |
|                                 | 194. PC(35:4) PE(38:4)                | -0.13 | 0.87               | 0.91  | 1  |
|                                 | 195. PC(40:5)                         | 0.12  | 0.87               | 0.91  | 2  |
|                                 | 196. LPC(22:5)                        | 0.11  | 0.90               | 0.92  | 4  |
|                                 | 197. LPC(18:2/0:0)                    | -0.09 | 0.90               | 0.92  | 10 |
|                                 | 198. Fatty acid C20:5 methyl ester    | 0.08  | 0.91               | 0.93  | 1  |
|                                 | 199. Biliverdin hydrochloride b       | -0.06 | 0.91               | 0.93  | 1  |
|                                 | 200. PC(28:2)                         | 0.05  | 0.92               | 0.93  | 1  |
|                                 | 201. PC(38:3)                         | 0.05  | 0.92               | 0.93  | 1  |
|                                 | 202. Ceramide PE(35:2) SPM(32:2)      | -0.10 | 0.95               | 0.97  | 2  |
| <b>Men (n<sub>N</sub>=1078)</b> | 1. 1,2-dipalmitoleoyl-sn-glycero-3-PC | -0.78 | 9x10 <sup>-5</sup> | 0.005 | 6  |
|                                 | 2. PC(34:4)                           | -0.76 | 9x10 <sup>-5</sup> | 0.005 | 10 |
|                                 | 3. PC(34:3) PE(37:3)                  | -0.76 | 9x10 <sup>-5</sup> | 0.005 | 18 |

|                                          |       |                    |       |    |
|------------------------------------------|-------|--------------------|-------|----|
| 4. Hippuric acid                         | 0.74  | $9 \times 10^{-5}$ | 0.005 | 3  |
| 5. MAG(18:0)                             | -0.65 | $2 \times 10^{-4}$ | 0.005 | 53 |
| 6. 1-palmitoyl-2-hydroxy-sn-glycero-3-PC | -0.67 | $2 \times 10^{-4}$ | 0.005 | 58 |
| 7. PC(38:7)                              | -0.75 | $2 \times 10^{-4}$ | 0.005 | 20 |
| 8. 2-Ketohexanoic acid                   | -0.70 | $3 \times 10^{-4}$ | 0.006 | 27 |
| 9. LPC(16:1/0:0)                         | -0.67 | $3 \times 10^{-4}$ | 0.006 | 2  |
| 10. LPC(0:0/16:0)                        | -0.69 | $3 \times 10^{-4}$ | 0.006 | 1  |
| 11. Indole-3-carbinol                    | 0.67  | $4 \times 10^{-4}$ | 0.006 | 46 |
| 12. PC(38:3)                             | 0.63  | $4 \times 10^{-4}$ | 0.006 | 37 |
| 13. PS(18:0)                             | -0.63 | $4 \times 10^{-4}$ | 0.006 | 39 |
| 14. LPC(0:0/18:0)                        | -0.65 | $5 \times 10^{-4}$ | 0.008 | 62 |
| 15. LPC(22:5)                            | -0.63 | $5 \times 10^{-4}$ | 0.008 | 44 |
| 16. PC(36:6)                             | -0.62 | $5 \times 10^{-4}$ | 0.008 | 48 |
| 17. LPC(0:0/16:1)                        | -0.59 | $5 \times 10^{-4}$ | 0.008 | 42 |
| 18. LPC(18:1)                            | -0.62 | $8 \times 10^{-4}$ | 0.008 | 44 |
| 19. LPC(20:3)                            | -0.62 | $8 \times 10^{-4}$ | 0.008 | 6  |
| 20. LPC(20:1)                            | -0.61 | $8 \times 10^{-4}$ | 0.008 | 38 |
| 21. PC(36:5)                             | -0.61 | 0.001              | 0.008 | 10 |

|                                     |       |       |       |    |
|-------------------------------------|-------|-------|-------|----|
| 22. 1,2-dilinoleoyl-sn-glycero-3-PC | -0.62 | 0.001 | 0.008 | 20 |
| 23. PC(36:3) PE(39:3)               | -0.62 | 0.001 | 0.008 | 15 |
| 24. Indoleacetic acid               | 0.60  | 0.001 | 0.008 | 19 |
| 25. MAG(16:0)                       | -0.58 | 0.002 | 0.01  | 22 |
| 26. LPC(22:4)                       | -0.59 | 0.002 | 0.01  | 19 |
| 27. PC(34:5) PE(37:5)               | -0.60 | 0.002 | 0.01  | 22 |
| 28. LPC(0:0/20:4)                   | -0.57 | 0.002 | 0.01  | 3  |
| 29. Corticosterone                  | -0.56 | 0.002 | 0.01  | 20 |
| 30. PC(38:4)                        | -0.53 | 0.002 | 0.01  | 19 |
| 31. PC(32:1)                        | -0.53 | 0.002 | 0.01  | 25 |
| 32. Decanoyl-L-carnitine            | 0.53  | 0.002 | 0.01  | 41 |
| 33. LPC(20:4/0:0)                   | -0.53 | 0.002 | 0.01  | 32 |
| 34. Biliverdin hydrochloride a      | -0.53 | 0.002 | 0.01  | 6  |
| 35. Geranyl acetoacetate            | -0.52 | 0.002 | 0.01  | 9  |
| 36. Arachidonic acid ethyl ester    | -0.52 | 0.002 | 0.01  | 18 |
| 37. PC(34:2) PE(37:2)               | -0.52 | 0.002 | 0.01  | 17 |
| 38. MAG(18:1)                       | -0.52 | 0.002 | 0.01  | 25 |

|                                                                         |       |       |      |    |
|-------------------------------------------------------------------------|-------|-------|------|----|
| 39. 4-Androsten-11Beta-ol-3,17-dione 11-Hydroxy-4-androstene-3,17-dione | 0.52  | 0.002 | 0.01 | 23 |
| 40. PC(40:5)                                                            | -0.51 | 0.002 | 0.01 | 21 |
| 41. LPC(22:5)                                                           | -0.51 | 0.002 | 0.01 | 15 |
| 42. MAG(14:0)                                                           | -0.51 | 0.003 | 0.01 | 14 |
| 43. Cholic acid                                                         | 0.50  | 0.003 | 0.01 | 12 |
| 44. L-Octanoylcarnitine                                                 | 0.50  | 0.004 | 0.02 | 6  |
| 45. LPC(22:5)                                                           | -0.49 | 0.004 | 0.02 | 9  |
| 46. PC(35:4) PE(38:4)                                                   | -0.49 | 0.004 | 0.02 | 5  |
| 47. Prostaglandin J2                                                    | 0.49  | 0.005 | 0.02 | 5  |
| 48. PC(38:5) PE(41:5)                                                   | -0.48 | 0.005 | 0.02 | 2  |
| 49. LPE(18:1)                                                           | -0.48 | 0.005 | 0.02 | 1  |
| 50. Gamma-Tocopherol                                                    | -0.47 | 0.005 | 0.02 | 10 |
| 51. LPC(18:1)                                                           | -0.47 | 0.005 | 0.02 | 12 |
| 52. LPC(20:5/0:0)                                                       | -0.46 | 0.005 | 0.02 | 15 |
| 53. 1-oleoyl-2-hydroxy-sn-glycero-3-PC                                  | -0.46 | 0.005 | 0.02 | 12 |
| 54. L-Aspartyl-L-phenylalanine                                          | 0.46  | 0.005 | 0.02 | 12 |

|                                                                                  |       |       |      |    |
|----------------------------------------------------------------------------------|-------|-------|------|----|
| 55. 1,2-dioleoyl-sn-glycero-3-phosphocholine 1,2-dipetroselenoyl-sn-glycero-3-PC | -0.46 | 0.005 | 0.02 | 13 |
| 56. Treprostinil                                                                 | 0.45  | 0.005 | 0.02 | 21 |
| 57. PC(36:1)                                                                     | -0.45 | 0.005 | 0.02 | 24 |
| 58. C16-20:5 PC                                                                  | -0.44 | 0.005 | 0.02 | 31 |
| 59. 1-stearoyl-2-arachidonoyl-sn-glycero-3-PE C15-20:4 PC                        | -0.44 | 0.005 | 0.02 | 9  |
| 60. 2a-(3-Hydroxypropyl)-1a,25-dihydroxy-19-norvitamin D3                        | 0.44  | 0.005 | 0.02 | 19 |
| 61. Bilirubin II                                                                 | -0.43 | 0.005 | 0.02 | 5  |
| 62. MAG(18:2)                                                                    | -0.42 | 0.005 | 0.02 | 2  |
| 63. Piperine                                                                     | -0.42 | 0.005 | 0.02 | 2  |
| 64. Betaine                                                                      | -0.41 | 0.005 | 0.02 | 10 |
| 65. PC(34:0)                                                                     | -0.41 | 0.005 | 0.02 | 15 |
| 66. PC(42:7)                                                                     | 0.41  | 0.005 | 0.02 | 14 |
| 67. LPE(18:0)                                                                    | -0.41 | 0.005 | 0.02 | 14 |
| 68. L-Tryptophan                                                                 | -0.41 | 0.006 | 0.02 | 12 |
| 69. Ceramide PE(35:2) SPM(32:2)                                                  | 0.41  | 0.006 | 0.02 | 21 |

|                                                |       |       |      |    |
|------------------------------------------------|-------|-------|------|----|
| 70. Dodecanedioic acid                         | 0.40  | 0.006 | 0.02 | 21 |
| 71. PC(28:2)                                   | 0.40  | 0.006 | 0.02 | 25 |
| 72. LPC(0:0/18:2)                              | -0.40 | 0.006 | 0.02 | 5  |
| 73. Butyryl-L-carnitine Isobutyryl-L-carnitine | 0.40  | 0.006 | 0.02 | 5  |
| 74. 1-Stearoyl-2-Hydroxy-sn-Glycero-3-PE       | -0.40 | 0.008 | 0.02 | 9  |
| 75. PC(33:1) PE(36:1)                          | 0.39  | 0.009 | 0.02 | 3  |
| 76. 3a,6b,7b-Trihydroxy-5b-cholanoic acid      | 0.39  | 0.009 | 0.02 | 1  |
| 77. LPC(18:2/0:0)                              | -0.39 | 0.009 | 0.02 | 1  |
| 78. Linoleic acid                              | -0.39 | 0.009 | 0.02 | 1  |
| 79. Propranolol                                | 0.39  | 0.01  | 0.02 | 2  |
| 80. 1-arachidoyl-2-hydroxy-sn-glycero-3-PC     | -0.38 | 0.01  | 0.02 | 10 |
| 81. Stearic acid                               | -0.38 | 0.01  | 0.02 | 12 |
| 82. Bilirubin I                                | -0.38 | 0.01  | 0.02 | 11 |
| 83. LPC(0:0/20:5)                              | -0.38 | 0.01  | 0.02 | 10 |
| 84. 1-oleoyl-2-palmitoyl-sn-glycero-3-PC       | -0.38 | 0.01  | 0.02 | 19 |

|                                                                      |       |      |      |    |
|----------------------------------------------------------------------|-------|------|------|----|
| 85. L-Proline                                                        | -0.37 | 0.01 | 0.02 | 14 |
| 86. cis-5-Tetradecenoylcarnitine                                     | 0.37  | 0.01 | 0.02 | 7  |
| 87. Arachidonic acid methyl ester                                    | -0.37 | 0.01 | 0.02 | 14 |
| 88. Alpha-Tocopherol                                                 | -0.37 | 0.01 | 0.02 | 5  |
| 89. Arachidonic acid                                                 | -0.36 | 0.01 | 0.02 | 21 |
| 90. Uric acid                                                        | -0.35 | 0.02 | 0.04 | 10 |
| 91. PC(34:3)                                                         | -0.35 | 0.02 | 0.04 | 1  |
| 92. PC(35:3) PE(38:3)                                                | -0.35 | 0.02 | 0.04 | 2  |
| 93. Ornithine                                                        | -0.35 | 0.03 | 0.06 | 1  |
| 94. MAG(16:1)                                                        | -0.35 | 0.03 | 0.06 | 1  |
| 95. C12 Carnitine                                                    | 0.35  | 0.03 | 0.06 | 2  |
| 96. Palmitic acid                                                    | -0.34 | 0.03 | 0.06 | 6  |
| 97. 3-Pyridylacetic<br>acid trigonelline                             | 0.33  | 0.03 | 0.06 | 3  |
| 98. 10-nitro-9E-octadecenoic<br>acid 9-nitro-9E-octadecenoic<br>acid | 0.32  | 0.04 | 0.08 | 3  |
| 99. MAG(20:5)                                                        | -0.32 | 0.04 | 0.08 | 4  |
| 100. 1-linoleoyl-2-stearoyl-<br>sn-glycerol                          | -0.32 | 0.04 | 0.08 | 14 |



|      |                                              |       |      |      |    |
|------|----------------------------------------------|-------|------|------|----|
| 101. | Indolelactic acid                            | 0.32  | 0.05 | 0.10 | 14 |
| 102. | 3-cis-Hydroxy-b,e-Caroten-3'-one             | -0.31 | 0.06 | 0.12 | 12 |
| 103. | LPC(20:2)                                    | -0.31 | 0.06 | 0.12 | 15 |
| 104. | 1,2-dilinoleoyl-sn-glycero-3-PC              | -0.31 | 0.07 | 0.13 | 2  |
| 105. | Hypoxanthine                                 | -0.30 | 0.07 | 0.13 | 1  |
| 106. | Alpha-Linolenic acid                         | -0.30 | 0.08 | 0.15 | 2  |
| 107. | Barogenin                                    | 0.30  | 0.08 | 0.15 | 2  |
| 108. | Fatty acid C20:5 methyl ester                | -0.29 | 0.08 | 0.15 | 2  |
| 109. | dehydroepiandrosterone sulfate (sodium salt) | 0.28  | 0.08 | 0.15 | 1  |
| 110. | Theobromine                                  | -0.27 | 0.09 | 0.16 | 1  |
| 111. | cis/trans-Oleic acid                         | -0.27 | 0.09 | 0.16 | 1  |
| 112. | Creatinine                                   | 0.27  | 0.09 | 0.16 | 10 |
| 113. | sodium glycochenodeoxycholate                | 0.26  | 0.1  | 0.18 | 1  |
| 114. | Oleoyl-L-carnitine hydrochloride             | 0.26  | 0.1  | 0.18 | 1  |
| 115. | L-Tyrosine o-Tyrosine                        | -0.26 | 0.11 | 0.19 | 4  |

|      |                                                  |       |      |      |    |
|------|--------------------------------------------------|-------|------|------|----|
| 116. | 1,3,7-Trimethyluric acid                         | -0.25 | 0.11 | 0.19 | 6  |
| 117. | 1-O-1'-(Z)-octadecenyl-2-hydroxy-sn-glycero-3-PE | -0.25 | 0.11 | 0.19 | 4  |
| 118. | LPE(20:4)                                        | -0.25 | 0.12 | 0.20 | 3  |
| 119. | Choline                                          | 0.25  | 0.12 | 0.20 | 3  |
| 120. | Ceramide PE(34:1)                                | 0.25  | 0.12 | 0.20 | 3  |
| 121. | LPE(18:2)                                        | -0.24 | 0.12 | 0.20 | 2  |
| 122. | LPC(18e:0/0:0)                                   | -0.24 | 0.13 | 0.21 | 1  |
| 123. | C16 Carnitine                                    | 0.24  | 0.13 | 0.21 | 1  |
| 124. | Deoxycholic acid glycine conjugate               | 0.23  | 0.13 | 0.21 | 1  |
| 125. | SPM(42:3)                                        | 0.23  | 0.13 | 0.21 | 1  |
| 126. | N-(15Z-tetracosenoyl)-sphinganine-1-PC           | -0.23 | 0.13 | 0.21 | 1  |
| 127. | PC(28:1)                                         | -0.23 | 0.13 | 0.21 | 10 |
| 128. | Gamma-Caprolactone                               | 0.22  | 0.14 | 0.21 | 1  |
| 129. | Ceramide PE(35:1) SPM(32:1)                      | -0.22 | 0.14 | 0.21 | 9  |
| 130. | Biliverdin hydrochloride b                       | -0.22 | 0.14 | 0.21 | 5  |

|      |                                                |       |      |      |    |
|------|------------------------------------------------|-------|------|------|----|
| 131. | gamma-Glutamyl-leucine                         | -0.21 | 0.14 | 0.21 | 5  |
| 132. | DL-2-Aminooctanoic acid                        | -0.21 | 0.14 | 0.21 | 12 |
| 133. | PC(40:6)                                       | 0.21  | 0.14 | 0.21 | 12 |
| 134. | D-erythro-sphingosine                          | 0.21  | 0.15 | 0.22 | 5  |
| 135. | Deoxycholic acid                               | 0.21  | 0.15 | 0.22 | 2  |
| 136. | PC(38:2)                                       | 0.21  | 0.15 | 0.22 | 14 |
| 137. | Ceramide<br>PE(33:1) Sphingomyelin(30:1)       | 0.20  | 0.15 | 0.22 | 10 |
| 138. | Acetaminophen                                  | 0.20  | 0.17 | 0.25 | 11 |
| 139. | Lactosyl<br>ceramide(d18:1/16:0)               | 0.20  | 0.17 | 0.25 | 12 |
| 140. | Dodecanoic acid                                | 0.19  | 0.18 | 0.26 | 10 |
| 141. | 1-palmitoyl-2-docosa-hexaenoyl-sn-glycero-3-PC | -0.19 | 0.18 | 0.26 | 1  |
| 142. | Stachydrine                                    | 0.19  | 0.2  | 0.26 | 1  |
| 143. | PC(35:2) PE(38:2)                              | -0.19 | 0.2  | 0.28 | 12 |
| 144. | Creatine                                       | -0.19 | 0.21 | 0.29 | 1  |

|      |                                     |       |      |      |    |
|------|-------------------------------------|-------|------|------|----|
| 145. | D-Urobilinogen I-Urobilin           | 0.18  | 0.21 | 0.29 | 4  |
| 146. | Ceramide PE(36:2)                   | 0.17  | 0.22 | 0.30 | 6  |
| 147. | 1-oleoyl-2-hydroxy-sn-glycero-3-PE  | -0.16 | 0.22 | 0.30 | 19 |
| 148. | Chenodeoxycholic acid               | 0.16  | 0.25 | 0.34 | 8  |
| 149. | 5a-Androst-3-en-17-one              | -0.16 | 0.25 | 0.34 | 7  |
| 150. | Flavone                             | 0.15  | 0.25 | 0.34 | 12 |
| 151. | LacCer(d18:1/14:0)                  | 0.15  | 0.27 | 0.36 | 10 |
| 152. | Lyso-PAF C-18                       | -0.15 | 0.27 | 0.36 | 1  |
| 153. | Linoleyl carnitine                  | 0.15  | 0.3  | 0.40 | 2  |
| 154. | L-Acetylcarnitine                   | 0.15  | 0.31 | 0.41 | 2  |
| 155. | MAG(18:3)                           | -0.14 | 0.32 | 0.41 | 2  |
| 156. | L-Leucine L-Norleucine              | -0.14 | 0.32 | 0.41 | 3  |
| 157. | LPC(18:3)                           | -0.14 | 0.32 | 0.41 | 4  |
| 158. | Oleamide                            | 0.14  | 0.32 | 0.41 | 5  |
| 159. | 6-hydroxy-5-cholestanol cholesterol | -0.14 | 0.33 | 0.41 | 6  |
| 160. | 7-Ketocholesterol                   | -0.14 | 0.33 | 0.41 | 3  |

|      |                                                                     |       |      |      |    |
|------|---------------------------------------------------------------------|-------|------|------|----|
| 161. | e-Caprolactam                                                       | -0.13 | 0.33 | 0.41 | 2  |
| 162. | 1,2-dipalmitoyl-sn-glycero-3-PC                                     | 0.13  | 0.34 | 0.42 | 2  |
| 163. | LPC(20:1)                                                           | -0.13 | 0.34 | 0.42 | 4  |
| 164. | 1-vaccenoyl-2-palmitoyl-sn-glycerol                                 | -0.13 | 0.34 | 0.42 | 1  |
| 165. | PC(O-18:1/0:0) PC(P-18:0/0:0)                                       | 0.12  | 0.35 | 0.43 | 1  |
| 166. | Palmitoleic acid                                                    | -0.12 | 0.35 | 0.43 | 10 |
| 167. | Cortisol                                                            | -0.12 | 0.36 | 0.44 | 1  |
| 168. | Hyodeoxycholic acid                                                 | 0.12  | 0.37 | 0.44 | 1  |
| 169. | 17-phenyl trinor Prostaglandin E2 17-phenyl trinor Prostaglandin D2 | 0.12  | 0.37 | 0.44 | 10 |
| 170. | Paraxanthine Theophylline                                           | 0.11  | 0.38 | 0.45 | 1  |
| 171. | SPM(41:2)                                                           | 0.11  | 0.4  | 0.47 | 2  |
| 172. | Phenylalanine                                                       | 0.11  | 0.45 | 0.53 | 1  |
| 173. | PC(30:2)                                                            | -0.11 | 0.46 | 0.53 | 10 |
| 174. | SPM(d18:2/18:1)                                                     | -0.11 | 0.46 | 0.53 | 1  |
| 175. | Naproxen                                                            | 0.11  | 0.46 | 0.53 | 1  |

|      |                                                 |       |      |      |    |
|------|-------------------------------------------------|-------|------|------|----|
| 176. | SPM(40:2)                                       | -0.10 | 0.52 | 0.60 | 1  |
| 177. | Caffeine                                        | -0.10 | 0.55 | 0.63 | 1  |
| 178. | S-(4,5-Dihydro-2-methyl-3-furanyl)ethanethioate | 0.10  | 0.57 | 0.65 | 12 |
| 179. | PC(29:1)                                        | 0.10  | 0.58 | 0.65 | 1  |
| 180. | Ceramide PE(37:2) SPM(34:2)                     | -0.10 | 0.58 | 0.65 | 2  |
| 181. | 2,6 dimethylheptanoyl carnitine                 | -0.10 | 0.61 | 0.68 | 3  |
| 182. | N-(9Z-octadecenoyl)-sphing-4-enine-1-PC         | -0.10 | 0.62 | 0.69 | 3  |
| 183. | L-Phenylalanine                                 | 0.10  | 0.63 | 0.69 | 1  |
| 184. | PC(37:5) PE(40:5)                               | 0.10  | 0.63 | 0.69 | 2  |
| 185. | 4,8 dimethylnonanoyl carnitine                  | 0.10  | 0.65 | 0.71 | 2  |
| 186. | Fatty acid C22:6                                | 0.10  | 0.68 | 0.74 | 1  |
| 187. | Myristic acid                                   | -0.10 | 0.71 | 0.77 | 5  |
| 188. | N-(octadecanoyl)-sphing-4-enine-1-PC            | -0.10 | 0.73 | 0.78 | 9  |
| 189. | Ceramide PE(38:2)                               | -0.10 | 0.75 | 0.80 | 6  |

|      |                                                   |       |      |       |   |
|------|---------------------------------------------------|-------|------|-------|---|
| 190. | LPE(16:0)                                         | -0.10 | 0.83 | 0.882 | 7 |
| 191. | L-Carnitine                                       | -0.10 | 0.85 | 0.90  | 1 |
| 192. | PC(15:2/0:0) PE(18:2/0:0)                         | 0.10  | 0.86 | 0.90  | 1 |
| 193. | Pantothenic acid                                  | -0,09 | 0.87 | 0.90  | 1 |
| 194. | Heptadecanoic acid                                | -0,09 | 0.87 | 0.90  | 2 |
| 195. | Pentadecanoic acid                                | -0,09 | 0.87 | 0.90  | 2 |
| 196. | Salicylic acid Aspirin                            | 0,09  | 0.88 | 0.90  | 2 |
| 197. | 3-Indolepropionic acid                            | 0,09  | 0.88 | 0.90  | 3 |
| 198. | 1-palmitoyl-2-hydroxy-sn-glycero-3-PE             | 0,09  | 0.89 | 0.90  | 4 |
| 199. | Benzenebutanoic acid                              | -0,09 | 0.89 | 0.90  | 2 |
| 200. | PC(30:1)                                          | -0,09 | 0.9  | 0.90  | 1 |
| 201. | N-palmitoyl-D-erythro-sphingosylphosphorylcholine | 0,09  | 0.93 | 0.93  | 1 |
| 202. | Glycocholic acid                                  | 0,09  | 0.95 | 0.95  | 1 |

**Association of correlation among molecular features a with age**

|              |                    |             |                 |                 |            |
|--------------|--------------------|-------------|-----------------|-----------------|------------|
| <b>Women</b> |                    |             | <i>P</i> -value | <i>P</i> -value | Validation |
|              | Molecular features | Correlation |                 | adjusted        | (>50%)     |

|                                                                             |       |                    |       |    |
|-----------------------------------------------------------------------------|-------|--------------------|-------|----|
| 1. Palmitoleic acid – Stearic acid                                          | -0.75 | $3 \times 10^{-4}$ | 0.008 | 2  |
| 2. Linoleic acid – Stearic acid                                             | -0.73 | $4 \times 10^{-4}$ | 0.008 | 1  |
| 3. Stearic acid – Palmitic acid                                             | -0.72 | $4 \times 10^{-4}$ | 0.008 | 34 |
| 4. Stearic acid – cis/trans-Oleic acid                                      | -0.70 | $4 \times 10^{-4}$ | 0.008 | 1  |
| 5. PC(32:1) – PC(35:3) PE(38:3)                                             | 0.72  | $5 \times 10^{-4}$ | 0.008 | 54 |
| 6. Ceramide PE(35:2) SPM(32:2) – PC(32:1)                                   | 0.70  | $5 \times 10^{-4}$ | 0.008 | 2  |
| 7. 1-Stearoyl-2-Hydroxy-sn-Glycero-3-PE – LPE(20:4)                         | -0.65 | $6 \times 10^{-4}$ | 0.008 | 27 |
| 8. 1-2-dipalmitoyl-sn-glycero-3-PC – N-(15Z-tetracosenoyl)-sphinganine-1-PC | -0.69 | $6 \times 10^{-4}$ | 0.008 | 28 |
| 9. PC(28:2) – PC(32:1)                                                      | 0.69  | 0.001              | 0.008 | 57 |
| 10. SPM(40:2) – Lactosyl ceramide(d18:1/16:0)                               | -0.67 | 0.001              | 0.008 | 25 |
| 11. Heptadecanoic acid – Stearic acid                                       | -0.64 | 0.001              | 0.008 | 4  |
| 12. Biliverdin hydrochloride b – Bilirubin II                               | -0.63 | 0.001              | 0.008 | 25 |
| 13. LPC(20:4/0:0) – PC(38:4)                                                | -0.65 | 0.001              | 0.008 | 1  |



|                                                                                   |       |       |      |    |
|-----------------------------------------------------------------------------------|-------|-------|------|----|
| 14. N-(15Z-tetracosenoyl)-<br>sphinganine-1-PC – Lactosyl<br>ceramide(d18:1/16:0) | -0.65 | 0.002 | 0.01 | 20 |
| 15. Deoxycholic acid –<br>Deoxycholic acid glycine<br>conjugate                   | -0.63 | 0.002 | 0.01 | 26 |
| 16. N-palmitoyl-D-erythro-<br>sphingosylphosphorylcholine –<br>SPM(40:2)          | -0.62 | 0.002 | 0.01 | 26 |
| 17. PC(34:4) – PC(38:7)                                                           | 0.62  | 0.002 | 0.01 | 2  |
| 18. 1-2-dilinoleoyl-sn-glycero-3-<br>PC – PC(38:4)                                | -0.62 | 0.003 | 0.01 | 20 |
| 19. Ceramide PE(35:2) SPM(32:2)<br>– 1-oleoyl-2-palmitoyl-sn-<br>glycero-3-PC     | 0.61  | 0.003 | 0.01 | 2  |
| 20. PC(34:4) – PC(35:3) PE(38:3)                                                  | 0.61  | 0.003 | 0.01 | 37 |
| 21. PC(30:1) – SPM(40:2)                                                          | -0.61 | 0.003 | 0.01 | 36 |
| 22. Deoxycholic acid glycine<br>conjugate – Chenodeoxycholic<br>acid              | -0.60 | 0.004 | 0.02 | 23 |
| 23. Fatty acid C20:5 methyl ester –<br>PC(34:5) PE(37:5)                          | -0.60 | 0.004 | 0.02 | 1  |

|                                                             |       |       |      |    |
|-------------------------------------------------------------|-------|-------|------|----|
| 24. PC(28:2) – 1-oleoyl-2-palmitoyl-sn-glycero-3-PC         | 0.60  | 0.004 | 0.02 | 2  |
| 25. PC(28:2) – PC(34:0)                                     | 0.59  | 0.004 | 0.02 | 13 |
| 26. 1-palmitoyl-2-hydroxy-sn-glycero-3-PE – LPE(20:4)       | -0.59 | 0.005 | 0.02 | 13 |
| 27. Biliverdin hydrochloride b – Biliverdin hydrochloride a | -0.59 | 0.006 | 0.02 | 29 |
| 28. Biliverdin hydrochloride b – Bilirubin I                | -0.59 | 0.006 | 0.02 | 16 |
| 29. Myristic acid – Stearic acid                            | -0.58 | 0.007 | 0.02 | 1  |
| 30. LPC(20:5/0:0) – PC(34:5) PE(37:5)                       | -0.58 | 0.007 | 0.02 | 26 |
| 31. Fatty acid C20:5 methyl ester – PC(38:7)                | -0.58 | 0.007 | 0.02 | 1  |
| 32. 1-stearoyl-2-hydroxy-sn-glycero-3-PC – PC(40:5)         | -0.52 | 0.007 | 0.02 | 12 |
| 33. D-Urobilinogen I-Urobilin – PC(40:5)                    | -0.51 | 0.008 | 0.02 | 13 |
| 34. PC(36:6) – PC(38:7)                                     | 0.51  | 0.008 | 0.02 | 5  |
| 35. PC(36:5) – PC(38:7)                                     | 0.50  | 0.008 | 0.02 | 28 |

|                                                                                                      |       |       |      |    |
|------------------------------------------------------------------------------------------------------|-------|-------|------|----|
| 36. 4-8 dimethylnonanoyl carnitine<br>– PC(40:5)                                                     | 0.48  | 0.009 | 0.02 | 17 |
| 37. MAG(18:3) –PC(40:5)                                                                              | -0.42 | 0.009 | 0.02 | 9  |
| 38. MAG(18:0) –<br>PC(38:5) PE(41:5)                                                                 | -0.41 | 0.009 | 0.02 | 41 |
| 39. Arachidonic acid –<br>PC(38:5) PE(41:5)                                                          | 0.42  | 0.009 | 0.02 | 21 |
| 40. Heptadecanoic acid –<br>PC(38:5) PE(41:5)                                                        | -0.43 | 0.009 | 0.02 | 22 |
| 41. Phenylalanine –<br>PC(38:5) PE(41:5)                                                             | 0.40  | 0.01  | 0.02 | 13 |
| 42. 7-Ketocholesterol –Alpha-<br>Tocopherol                                                          | -0.30 | 0.01  | 0.02 | 2  |
| 43. 17-phenyl trinor Prostaglandin<br>E2 17 – phenyl trinor<br>Prostaglandin D2-Alpha-<br>Tocopherol | -0.33 | 0.01  | 0.02 | 10 |
| 44. sodium<br>glycochenodeoxycholate –<br>Alpha-Tocopherol                                           | -0.30 | 0.01  | 0.02 | 6  |
| 45. Deoxycholic acid glycine<br>conjugate – Alpha-Tocopherol                                         | -0.31 | 0.01  | 0.02 | 12 |

|                                                                                 |       |      |      |    |
|---------------------------------------------------------------------------------|-------|------|------|----|
| 46. Chenodeoxycholic acid –<br>Alpha-Tocopherol                                 | -0.30 | 0.01 | 0.02 | 15 |
| 47. Linoleyl carnitine –Alpha-<br>Tocopherol                                    | -0.30 | 0.02 | 0.04 | 5  |
| 48. Choline – Arachidonic acid                                                  | 0.40  | 0.02 | 0.04 | 8  |
| 49. Creatinine – Arachidonic acid                                               | 0.42  | 0.02 | 0.04 | 18 |
| 50. LPC(20:4/0:0) – LPC(22:5)                                                   | -0.40 | 0.03 | 0.06 | 7  |
| 51. LPC(20:3) – LPC(22:5)                                                       | -0.42 | 0.03 | 0.06 | 23 |
| 52. LPC(20:5/0:0) – LPC(22:5)                                                   | -0.41 | 0.03 | 0.06 | 19 |
| 53. LPC(22:4) – N-(9Z-<br>octadecenoyl)-sphing-4-enine-<br>1-PC                 | -0.39 | 0.04 | 0.07 | 2  |
| 54. Biliverdin hydrochloride b –<br>N-(9Z-octadecenoyl)-sphing-4-<br>enine-1-PC | -0.21 | 0.04 | 0.07 | 1  |
| 55. Biliverdin hydrochloride a –<br>N-(9Z-octadecenoyl)-sphing-4-<br>enine-1-PC | -0.19 | 0.04 | 0.07 | 1  |
| 56. Bilirubin I – N-(9Z-<br>octadecenoyl)-sphing-4-enine-<br>1-PC               | -0.20 | 0.05 | 0.09 | 1  |

|                                                                                  |       |      |      |    |
|----------------------------------------------------------------------------------|-------|------|------|----|
| 57. Flavone – N-(octadecanoyl)-sphing-4-enine-1-PC                               | -0.23 | 0.05 | 0.09 | 23 |
| 58. Geranyl acetoacetate – N-(octadecanoyl)-sphing-4-enine-1-PC                  | -0.22 | 0.07 | 0.12 | 12 |
| 59. Dodecanedioic acid – N-(octadecanoyl)-sphing-4-enine-1-PC                    | -0.25 | 0.07 | 0.12 | 1  |
| 60. 1-3-7-Trimethyluric acid – N-palmitoyl-D-erythro-sphingosylphosphorylcholine | 0.25  | 0.07 | 0.12 | 14 |
| 61. L-Aspartyl-L-phenylalanine – LPC(16:1/0:0)                                   | -0.30 | 0.09 | 0.15 | 4  |
| 62. Heptadecanoic acid – LPC(16:1/0:0)                                           | -0.32 | 0.09 | 0.15 | 4  |
| 63. Choline – 10-nitro-9E-octadecenoic acid 9-nitro-9E-octadecenoic acid         | -0.29 | 0.1  | 0.16 | 2  |
| 64. 3-Pyridylacetic acid trigonelline – Alpha-Linolenic acid                     | -0.28 | 0.12 | 0.19 | 3  |
| 65. Stachydrine – Alpha-Linolenic acid                                           | -0.29 | 0.12 | 0.19 | 5  |

|                                                  |       |      |      |    |
|--------------------------------------------------|-------|------|------|----|
| 66. Benzenebutanoic acid – Alpha-Linolenic acid  | -0.22 | 0.13 | 0.20 | 10 |
| 67. Geranyl acetoacetate – Arachidonic acid      | -0.30 | 0.15 | 0.22 | 1  |
| 68. Dodecanedioic acid – Arachidonic acid        | -0.28 | 0.15 | 0.22 | 1  |
| 69. 5a-Androst-3-en-17-one – Arachidonic acid    | 0.25  | 0.15 | 0.22 | 6  |
| 70. Caffeine – Barogenin                         | -0.26 | 0.19 | 0.27 | 7  |
| 71. Hippuric acid – Barogenin                    | 0.25  | 0.19 | 0.27 | 2  |
| 72. L-Acetylcarnitine – Barogenin                | -0.25 | 0.19 | 0.27 | 14 |
| 73. Indolelactic acid – Barogenin                | -0.28 | 0.20 | 0.28 | 11 |
| 74. Geranyl acetoacetate – Bilirubin I           | 0.25  | 0.20 | 0.28 | 10 |
| 75. Dodecanedioic acid – Bilirubin I             | 0.23  | 0.22 | 0.30 | 1  |
| 76. 5a-Androst-3-en-17-one – Bilirubin I         | 0.22  | 0.22 | 0.30 | 1  |
| 77. Propranolol – Bilirubin I                    | 0.23  | 0.25 | 0.33 | 2  |
| 78. L-Phenylalanine – Biliverdin hydrochloride a | -0.24 | 0.3  | 0.40 | 9  |

|                                                                                        |       |      |      |    |
|----------------------------------------------------------------------------------------|-------|------|------|----|
| 79. 2-6 dimethylheptanoyl carnitine – Stearic acid                                     | -0.22 | 0.35 | 0.45 | 8  |
| 80. 4-Androsten-11Beta-ol-3-17-dione 11-Hydroxy-4-androstene-3-17-dione – Stearic acid | -0.13 | 0.35 | 0.45 | 5  |
| 81. Arachidonic acid – Stearic acid                                                    | -0.20 | 0.37 | 0.47 | 11 |
| 82. MAG(16:1) – Treprostinil                                                           | -0.23 | 0.4  | 0.50 | 15 |
| 83. MAG(16:0) – Treprostinil                                                           | -0.25 | 0.42 | 0.52 | 10 |
| 84. MAG(18:3) – Treprostinil                                                           | -0.23 | 0.45 | 0.55 | 1  |
| 85. Choline – Uric acid                                                                | -0.22 | 0.47 | 0.56 | 1  |
| 86. Betaine – Uric acid                                                                | -0.23 | 0.47 | 0.56 | 1  |
| 87. Barogenin – LPC(22:4)                                                              | -0.23 | 0.49 | 0.57 | 1  |
| 88. GCA – LPC(22:4)                                                                    | -0.24 | 0.49 | 0.57 | 2  |
| 89. Uric acid – D-Urobilinogen Urobilin                                                | 0.15  | 0.5  | 0.57 | 5  |
| 90. L-Leucine L-Norleucine – 1-stearoyl-2-hydroxy-sn-glycero-3-PC                      | 0.21  | 0.5  | 0.57 | 6  |
| 91. Hypoxanthine – 1-stearoyl-2-hydroxy-sn-glycero-3-PC                                | 0.22  | 0.55 | 0.62 | 4  |

|                                                                                |       |      |      |   |
|--------------------------------------------------------------------------------|-------|------|------|---|
| 92. PC(O-18:1/0:0) PE(P-18:0/0:0)<br>– 1-stearoyl-2-hydroxy-sn-glycero-3-PC    | 0.22  | 0.58 | 0.64 | 2 |
| 93. L-Tyrosine o-Tyrosine – 1-vaccenoyl-2-palmitoyl-sn-glycerol                | -0.23 | 0.58 | 0.64 | 2 |
| 94. Naproxen – 1-vaccenoyl-2-palmitoyl-sn-glycerol                             | 0.23  | 0.6  | 0.66 | 1 |
| 95. Oleamide – 2-6<br>dimethylheptanoyl carnitine                              | -0.22 | 0.62 | 0.67 | 1 |
| 96. Pentadecanoic acid – 2a-(3-Hydroxypropyl)-1a-25-dihydroxy-19-norvitamin D3 | -0.23 | 0.62 | 0.67 | 1 |
| 97. 3-Pyridylacetic acid trigonelline – 7-Ketocholesterol                      | 0.21  | 0.64 | 0.67 | 2 |
| 98. Stachydrine – 7 -<br>Ketocholesterol                                       | 0.22  | 0.64 | 0.67 | 1 |
| 99. Flavone – 5a-Androst-3-en-17-one                                           | 0.25  | 0.64 | 0.67 | 1 |
| 100. LPC(18:2/0:0) – 3-cis-Hydroxy-b-e-Caroten-3'-one                          | -0.20 | 0.69 | 0.71 | 2 |



|                    |                                                                |       |                    |       |    |
|--------------------|----------------------------------------------------------------|-------|--------------------|-------|----|
|                    | 101. Indole-3-carbinol – 3a-6b-7b-Trihydroxy-5b-cholanoic acid | -0.15 | 0.72               | 0.73  | 3  |
|                    | 102. MAG(16:1) – LPC(0:0/16:1)                                 | 0.20  | 0.82               | 0.83  | 4  |
|                    | 103. LPC(18:3) – LPC(18:2/0:0)                                 | 0.25  | 0.93               | 0.93  | 2  |
| Men ( $n_M=1078$ ) | 1. Palmitoleic acid – MAG(16:1)                                | -0.85 | $1 \times 10^{-5}$ | 0.001 | 21 |
|                    | 2. MAG(16:0) – LPC(16:1/0:0)                                   | -0.81 | $4 \times 10^{-5}$ | 0.002 | 53 |
|                    | 3. PC(35:3) PE(38:3) – PC(36:3) PE(39:3)                       | 0.81  | $4 \times 10^{-5}$ | 0.002 | 2  |
|                    | 4. MAG(16:0) – LPC(0:0/16:1)                                   | -0.80 | $6 \times 10^{-5}$ | 0.002 | 59 |
|                    | 5. MAG(18:1) – LPC(16:1/0:0)                                   | -0.78 | $1 \times 10^{-4}$ | 0.003 | 60 |
|                    | 6. MAG(18:0) – LPC(0:0/16:1)                                   | -0.76 | $2 \times 10^{-4}$ | 0.004 | 53 |
|                    | 7. MAG(16:1) – LPC(16:1/0:0)                                   | -0.76 | $2 \times 10^{-4}$ | 0.004 | 42 |
|                    | 8. MAG(16:1) – cis/trans-Oleic acid                            | -0.77 | $2 \times 10^{-4}$ | 0.004 | 35 |
|                    | 9. Ceramide PE(37:2) SPM(34:2) – SPM(d18:2/18:1)               | 0.77  | $2 \times 10^{-4}$ | 0.004 | 2  |
|                    | 10. LPE(18:2) – LPC(18:3)                                      | 0.74  | $4 \times 10^{-4}$ | 0.004 | 13 |
|                    | 11. PC(30:2) – SPM(d18:2/18:1)                                 | 0.74  | $4 \times 10^{-4}$ | 0.004 | 9  |

|                                                                                                 |       |                    |       |    |
|-------------------------------------------------------------------------------------------------|-------|--------------------|-------|----|
| 12. LPE(18:2) – LPC(0:0/18:2)                                                                   | 0.73  | $5 \times 10^{-4}$ | 0.005 | 18 |
| 13. MAG(18:0) – PC(32:1)                                                                        | -0.72 | $6 \times 10^{-4}$ | 0.005 | 49 |
| 14. LPE(18:2) – LPC(18:2/0:0)                                                                   | 0.71  | $8 \times 10^{-4}$ | 0.005 | 45 |
| 15. Palmitoleic acid –<br>LPC(0:0/16:1)                                                         | -0.71 | $8 \times 10^{-4}$ | 0.005 | 16 |
| 16. N-(9Z-octadecenoyl)-sphing-4-<br>enine-1-PC – 1,2-dilinoleoyl-<br>sn-glycero-3-PC           | 0.71  | $9 \times 10^{-4}$ | 0.005 | 1  |
| 17. Palmitoleic acid –<br>LPC(16:1/0:0)                                                         | -0.70 | $9 \times 10^{-4}$ | 0.005 | 1  |
| 18. Arachidonic acid ethyl ester –<br>LPC(16:1/0:0)                                             | -0.71 | $9 \times 10^{-4}$ | 0.005 | 21 |
| 19. LPC(0:0/16:1) – Palmitic acid                                                               | -0.70 | $9 \times 10^{-4}$ | 0.005 | 37 |
| 20. MAG(16:1) – LPC(0:0/16:1)                                                                   | -0.70 | 0.001              | 0.005 | 14 |
| 21. LPC(18:3) – LPC(18:2/0:0)                                                                   | 0.70  | 0.001              | 0.005 | 42 |
| 22. Salicylic acid Aspirin – 10-<br>nitro-9E-octadecenoic acid 9-<br>nitro-9E-octadecenoic acid | 0.69  | 0.001              | 0.005 | 12 |
| 23. Theobromine – 10-nitro-9E-<br>octadecenoic acid 9-nitro-9E-<br>octadecenoic acid            | 0.69  | 0.002              | 0.009 | 32 |

|                                                                                         |      |       |       |    |
|-----------------------------------------------------------------------------------------|------|-------|-------|----|
| 24. Creatine – 10-nitro-9E-octadecenoic acid 9-nitro-9E-octadecenoic acid               | 0.68 | 0.002 | 0.009 | 24 |
| 25. L-Leucine L-Norleucine – 10-nitro-9E-octadecenoic acid 9-nitro-9E-octadecenoic acid | 0.68 | 0.002 | 0.009 | 28 |
| 26. MAG(14:0) – LPE(18:0)                                                               | 0.69 | 0.004 | 0.02  | 8  |
| 27. 10-nitro-9E-octadecenoic acid 9-nitro-9E-octadecenoic acid – LPE(18:0)              | 0.69 | 0.004 | 0.02  | 16 |
| 28. Fatty acid C22:6 – LPE(18:0)                                                        | 0.67 | 0.004 | 0.02  | 17 |
| 29. 4-8 dimethylnonanoyl carnitine – LPE(18:0)                                          | 0.65 | 0.006 | 0.02  | 9  |
| 30. Indole-3-carbinol – 10-nitro-9E-octadecenoic acid 9-nitro-9E-octadecenoic acid      | 0.64 | 0.006 | 0.02  | 2  |
| 31. Acetaminophen – 10-nitro-9E-octadecenoic acid 9-nitro-9E-octadecenoic acid          | 0.65 | 0.006 | 0.02  | 1  |
| 32. 2-Ketohexanoic acid – 10-nitro-9E-octadecenoic acid 9-nitro-9E-octadecenoic acid    | 0.64 | 0.006 | 0.02  | 1  |

|                                                                                                                   |       |       |      |    |
|-------------------------------------------------------------------------------------------------------------------|-------|-------|------|----|
| 33. S-(4-5-Dihydro-2-methyl-3-furanyl) ethanethioate – 10-nitro-9E-octadecenoic acid 9-nitro-9E-octadecenoic acid | 0.63  | 0.009 | 0.03 | 32 |
| 34. L-Carnitine – 10-nitro-9E-octadecenoic acid 9-nitro-9E-octadecenoic acid                                      | 0.63  | 0.009 | 0.03 | 31 |
| 35. L-Phenylalanine – 10-nitro-9E-octadecenoic acid 9-nitro-9E-octadecenoic acid                                  | 0.62  | 0.009 | 0.03 | 26 |
| 36. Uric acid – 10-nitro-9E-octadecenoic acid 9-nitro-9E-octadecenoic acid                                        | 0.62  | 0.009 | 0.03 | 21 |
| 37. L-Tyrosine o-Tyrosine – LPE(20:4)                                                                             | 0.60  | 0.01  | 0.03 | 20 |
| 38. Naproxen – LPE(20:4)                                                                                          | 0.60  | 0.01  | 0.03 | 15 |
| 39. ε-Caprolactam – DL-2-Aminooctanoic acid                                                                       | -0.59 | 0.01  | 0.03 | 19 |
| 40. Choline – Gamma-Caprolactone                                                                                  | -0.56 | 0.01  | 0.03 | 5  |
| 41. Creatinine – Gamma-Caprolactone                                                                               | -0.58 | 0.02  | 0.05 | 9  |

|                                                  |       |      |      |    |
|--------------------------------------------------|-------|------|------|----|
| 42. e-Caprolactam – Gamma-Caprolactone           | 0.59  | 0.02 | 0.05 | 12 |
| 43. DL-2-Aminooctanoic acid – Gamma-Caprolactone | -0.56 | 0.02 | 0.05 | 12 |
| 44. Choline – L-Proline                          | 0.53  | 0.03 | 0.07 | 5  |
| 45. Creatinine – L-Proline                       | 0.52  | 0.03 | 0.07 | 6  |
| 46. e-Caprolactam – L-Proline                    | -0.52 | 0.03 | 0.07 | 13 |
| 47. DL-2-Aminooctanoic acid – L-Proline          | -0.51 | 0.05 | 0.12 | 21 |
| 48. Gamma – Caprolactone-L-Proline               | -0.50 | 0.05 | 0.12 | 13 |
| 49. Benzenebutanoic acid – Alpha-Linolenic acid  | 0.49  | 0.06 | 0.13 | 21 |
| 50. Geranyl acetoacetate – Arachidonic acid      | 0.48  | 0.06 | 0.13 | 5  |
| 51. LPC(20:4/0:0 – PC(34:0)                      | -0.46 | 0.06 | 0.13 | 12 |
| 52. LPC(20:2) – PC(34:0)                         | -0.45 | 0.07 | 0.15 | 11 |
| 53. LPC(20:3) – PC(34:0)                         | -0.45 | 0.07 | 0.15 | 11 |
| 54. 1-3-7-Trimethyluric acid – C16-20:5 PC       | 0.40  | 0.07 | 0.15 | 32 |

|                                                             |       |      |      |    |
|-------------------------------------------------------------|-------|------|------|----|
| 55. Deoxycholic acid glycine conjugate – PC(35:3) PE(38:3)  | -0.39 | 0.09 | 0.18 | 18 |
| 56. LPC(20:3) – Biliverdin hydrochloride a                  | -0.34 | 0.09 | 0.18 | 19 |
| 57. Lyso-PAF C-18 – Biliverdin hydrochloride a              | 0.33  | 0.11 | 0.21 | 9  |
| 58. LPC(20:2) – Biliverdin hydrochloride a                  | -0.32 | 0.11 | 0.21 | 8  |
| 59. LPC(20:1) – Biliverdin hydrochloride a                  | -0.34 | 0.11 | 0.21 | 5  |
| 60. PS(18:0) – Bilirubin I                                  | 0.32  | 0.13 | 0.24 | 2  |
| 61. L-Carnitine – LPC(22:5)                                 | 0.35  | 0.13 | 0.24 | 2  |
| 62. Bilirubin II – PC(34:2) PE(37:2)                        | -0.33 | 0.15 | 0.27 | 2  |
| 63. D-Urobilinogen I-Urobilin – PC(34:2) PE(37:2)           | -0.31 | 0.15 | 0.27 | 1  |
| 64. cis/trans-Oleic acid – PC(34:2) PE(37:2)                | 0.30  | 0.15 | 0.27 | 1  |
| 65. 1-linoleoyl-2-stearoyl-sn-glycerol – PC(34:2) PE(37:2)  | 0.32  | 0.17 | 0.29 | 2  |
| 66. 1-vaccenoyl-2-palmitoyl-sn-glycerol – PC(34:2) PE(37:2) | -0.31 | 0.17 | 0.29 | 3  |

|                                                                           |       |      |      |    |
|---------------------------------------------------------------------------|-------|------|------|----|
| 67. Ceramide PE(33:1) SPM(30:1)<br>– 1-oleoyl-2-palmitoyl-sn-glycero-3-PC | 0.31  | 0.18 | 0.30 | 5  |
| 68. Ceramide PE(34:1) – 1-oleoyl-2-palmitoyl-sn-glycero-3-PC              | 0.31  | 0.18 | 0.30 | 6  |
| 69. Stearic acid – cis/trans-Oleic acid                                   | -0.30 | 0.19 | 0.31 | 5  |
| 70. PC(32:1) – PC(35:3) PE(38:3)                                          | 0.30  | 0.19 | 0.31 | 7  |
| 71. Deoxycholic acid glycine conjugate – Chenodeoxycholic acid            | 0.35  | 0.21 | 0.33 | 10 |
| 72. Fatty acid C20:5 methyl ester – PC(34:5) PE(37:5)                     | 0.34  | 0.21 | 0.33 | 1  |
| 73. Cortisol – SPM(41:2)                                                  | 0.35  | 0.21 | 0.33 | 2  |
| 74. 6-hydroxy-5-cholestanol cholesterol – SPM(41:2)                       | -0.36 | 0.25 | 0.39 | 2  |
| 75. cis-5-Tetradecenoylcarnitine – SPM(41:2)                              | 0.34  | 0.27 | 0.41 | 2  |
| 76. 6-hydroxy-5-cholestanol cholesterol – PC(38:7)                        | 0.36  | 0.32 | 0.47 | 1  |

|                                                                   |       |      |      |    |
|-------------------------------------------------------------------|-------|------|------|----|
| 77. cis-5-Tetradecenoylcarnitine – PC(38:7)                       | 0.38  | 0.32 | 0.47 | 3  |
| 78. Cholic acid – PC(38:7)                                        | -0.37 | 0.34 | 0.48 | 14 |
| 79. PC(36:5) – PC(38:7)                                           | -0.38 | 0.34 | 0.48 | 12 |
| 80. 1-2-dilinoleoyl-sn-glycero-3-PC – PC(38:7)                    | -0.39 | 0.34 | 0.48 | 11 |
| 81. PC(36:3) PE(39:3) – PC(38:7)                                  | -0.35 | 0.35 | 0.48 | 11 |
| 82. SPM(41:2) – N-(15Z-tetracosenoyl)-sphinganine-1-PC            | 0.38  | 0.35 | 0.48 | 10 |
| 83. MAG(16:0) – C16-20:5 PC                                       | -0.39 | 0.36 | 0.48 | 2  |
| 84. MAG(18:3) – C16-20:5 PC                                       | -0.40 | 0.36 | 0.48 | 2  |
| 85. L-Leucine L-Norleucine – 1-stearoyl-2-hydroxy-sn-glycero-3-PC | -0.40 | 0.36 | 0.48 | 1  |
| 86. Hypoxanthine – 1-stearoyl-2-hydroxy-sn-glycero-3-PC           | -0.41 | 0.41 | 0.53 | 3  |
| 87. Caffeine – GCA                                                | -0.40 | 0.41 | 0.53 | 1  |
| 88. Creatinine – 1-Stearoyl-2-Hydroxy-sn-Glycero-3-PE             | -0.40 | 0.41 | 0.53 | 1  |
| 89. MAG(18:2) – LPC(0:0/18:2)                                     | -0.41 | 0.45 | 0.57 | 2  |



|                                                                                             |       |      |      |    |
|---------------------------------------------------------------------------------------------|-------|------|------|----|
| 90. Deoxycholic acid – cis-5-Tetradecenoylcarnitine                                         | 0.42  | 0.45 | 0.57 | 2  |
| 91. cis-5-Tetradecenoylcarnitine – 2a-(3-Hydroxypropyl)-1a,25-dihydroxy-19-norvitamin D3    | 0.39  | 0.46 | 0.57 | 3  |
| 92. LPC(0:0/20:4) – Biliverdin hydrochloride b                                              | -0.39 | 0.46 | 0.57 | 2  |
| 93. LPC(20:4/0:0) – Biliverdin hydrochloride b                                              | -0.38 | 0.52 | 0.64 | 4  |
| 94. 4-Androsten-11Beta-ol-3-17-dione 11-Hydroxy-4-androstene-3-17-dione – PC(35:3) PE(38:3) | 0.37  | 0.55 | 0.67 | 10 |
| 95. Arachidonic acid – PC(35:3) PE(38:3)                                                    | 0.36  | 0.57 | 0.68 | 1  |
| 96. Myristic acid – PC(36:5)                                                                | 0.33  | 0.58 | 0.68 | 10 |
| 97. 1-vaccenoyl-2-palmitoyl-sn-glycerol – SPM(40:2)                                         | 0.30  | 0.58 | 0.68 | 12 |
| 98. Ceramide PE(33:1) SPM(30:1) – SPM(40:2)                                                 | -0.30 | 0.61 | 0.71 | 1  |
| 99. Ceramide PE(34:1) – SPM(40:2)                                                           | -0.29 | 0.62 | 0.71 | 2  |

|      |                                                                              |       |      |      |    |
|------|------------------------------------------------------------------------------|-------|------|------|----|
| 100. | Oleoyl-L-carnitine hydrochloride – PC(36:1)                                  | 0.28  | 0.63 | 0.71 | 1  |
| 101. | Alpha-Tocopherol – PC(36:1)                                                  | 0.29  | 0.63 | 0.71 | 12 |
| 102. | 3a-6b-7b-Trihydroxy-5b-cholanoic acid – PC(36:1)                             | -0.26 | 0.65 | 0.72 | 10 |
| 103. | 1-O-1'-(Z)-octadecenyl-2-hydroxy-sn-glycero-3-phosphoethanolamine – PC(36:1) | -0.27 | 0.65 | 0.72 | 2  |
| 104. | D-erythro-sphingosine – PC(36:6)                                             | 0.25  | 0.68 | 0.75 | 5  |
| 105. | Oleamide – PC(36:6)                                                          | 0.24  | 0.71 | 0.77 | 3  |
| 106. | Piperine – PC(36:6)                                                          | 0.22  | 0.73 | 0.79 | 5  |
| 107. | dehydroepiandrosterone sulfate – PC(35:3) PE(38:3)                           | 0.22  | 0.75 | 0.80 | 3  |
| 108. | LPE(16:0) – PC(35:3) PE(38:3)                                                | 0.20  | 0.83 | 0.88 | 2  |
| 109. | LPC(0:0/20:5) – 1,2-dipalmitoleoyl-sn-glycero-3-PC                           | -0.19 | 0.85 | 0.89 | 1  |

|      |                                                                      |       |      |      |   |
|------|----------------------------------------------------------------------|-------|------|------|---|
| 110. | DL-2-Amino-octanoic acid– LPE(18:1)                                  | 0.20  | 0.86 | 0.89 | 1 |
| 111. | L-Tyrosine o-Tyrosine – Biliverdin hydrochloride b                   | -0.18 | 0.88 | 0.90 | 2 |
| 112. | Naproxen – Biliverdin hydrochloride b                                | -0.15 | 0.9  | 0.92 | 1 |
| 113. | L-Tryptophan – Biliverdin hydrochloride b                            | 0.15  | 0.93 | 0.94 | 2 |
| 114. | 16. 1-O-1'-(Z)-octadecenyl-2-hydroxy-sn-glycero-3-PE – LPC(20:5/0:0) | 0.12  | 0.97 | 0.97 | 2 |

**Association of ratios among molecular features a with age**

| Women (n <sub>w</sub> =804) | Molecular features                                                  | Correlation | P-value            | BH P-value adjusted | Validation (>50%) |
|-----------------------------|---------------------------------------------------------------------|-------------|--------------------|---------------------|-------------------|
|                             | 1. Acetaminophen/1-Stearoyl-2-Hydroxy-sn-Glycero-3-PE               | -0.67       | 2x10 <sup>-4</sup> | 0.002               | 15                |
|                             | 2. Arachidonic acid ethyl ester/1-vaccenoyl-2-palmitoyl-sn-glycerol | 0.67        | 2x10 <sup>-4</sup> | 0.002               | 21                |
|                             | 3. Deoxycholic acid glycine conjugate/N-palmitoyl-D-                | 0.66        | 2x10 <sup>-4</sup> | 0.002               | 23                |

|     |                                                                                      |       |                    |       |    |
|-----|--------------------------------------------------------------------------------------|-------|--------------------|-------|----|
|     | erythro-sphingosylphosphorylcholine                                                  |       |                    |       |    |
| 4.  | 10-nitro-9E-octadecenoic acid 9-nitro-9E-octadecenoic acid/PC(15:2/0:0) PE(18:2/0:0) | -0.64 | $2 \times 10^{-4}$ | 0.002 | 11 |
| 5.  | Paraxanthine Theophylline/GC A                                                       | -0.64 | $2 \times 10^{-4}$ | 0.002 | 1  |
| 6.  | Arachidonic acid/GCA                                                                 | -0.63 | $2 \times 10^{-4}$ | 0.002 | 35 |
| 7.  | Pantothenic acid/Ceramide PE(35:2) SPM(32:2)                                         | 0.63  | $2 \times 10^{-4}$ | 0.002 | 3  |
| 8.  | Acetaminophen/GCA                                                                    | -0.62 | $2 \times 10^{-4}$ | 0.002 | 49 |
| 9.  | Decanoyl-L-carnitine/LPC(0:0/18:2)                                                   | -0.67 | $3 \times 10^{-4}$ | 0.002 | 56 |
| 10. | LPC(0:0/20:5)/1,2-dipalmitoleoyl-sn-glycero-3-PC                                     | 0.62  | $3 \times 10^{-4}$ | 0.002 | 23 |
| 11. | DL-2-Amino-octanoic acid/LPE(18:1)                                                   | -0.61 | $3 \times 10^{-4}$ | 0.002 | 12 |
| 12. | 1-O-1'-(Z)-octadecenyl-2-hydroxy-sn-glycero-3-PE/LPC(0:0/18:2)                       | -0.60 | $3 \times 10^{-4}$ | 0.002 | 2  |

|                                                                                                                 |       |                    |       |    |
|-----------------------------------------------------------------------------------------------------------------|-------|--------------------|-------|----|
| 13. MAG(16:0)/PC(15:2/0:0) PE(18:2/0:0)                                                                         | -0.60 | 4x10 <sup>-4</sup> | 0.002 | 1  |
| 14. 6-hydroxy-5-cholestanol cholesterol/PC(15:2/0:0) PE(18:2/0:0)                                               | -0.60 | 4x10 <sup>-4</sup> | 0.002 | 34 |
| 15. L-Carnitine/1-Stearoyl-2-Hydroxy-sn-Glycero-3-PE                                                            | -0.59 | 4x10 <sup>-4</sup> | 0.002 | 33 |
| 16. 1-O-1'-(Z)-octadecenyl-2-hydroxy-sn-glycero-3-PE/LPC(20:5/0:0)                                              | -0.59 | 4x10 <sup>-4</sup> | 0.002 | 25 |
| 17. Arachidonic acid methyl ester/LPC(18:1)                                                                     | 0.60  | 4x10 <sup>-4</sup> | 0.002 | 11 |
| 18. Prostaglandin J2/1-palmitoyl-2-hydroxy-sn-glycero-3-phosphoethanolamine                                     | -0.59 | 0.001              | 0.005 | 10 |
| 19. Caffeine/GCA                                                                                                | -0.59 | 0.001              | 0.005 | 42 |
| 20. Creatinine/1-Stearoyl-2-Hydroxy-sn-Glycero-3-PE                                                             | -0.59 | 0.001              | 0.005 | 15 |
| 21. 2a-(3-Hydroxypropyl)-1a,25-dihydroxy-19-norvitamin D3/2a-(3-Hydroxypropyl)-1a,25-dihydroxy-19-norvitamin D3 | -0.59 | 0.001              | 0.005 | 12 |

|                                                                     |       |       |       |    |
|---------------------------------------------------------------------|-------|-------|-------|----|
| 22. Arachidonic acid methyl ester/PC(35:3) PE(38:3)                 | 0.66  | 0.002 | 0.009 | 2  |
| 23. Indolelactic acid/GCA                                           | -0.58 | 0.002 | 0.009 | 34 |
| 24. Pantothenic acid/GCA                                            | -0.58 | 0.002 | 0.009 | 63 |
| 25. Dodecanedioic acid/GCA                                          | -0.58 | 0.003 | 0.01  | 68 |
| 26. Arachidonic acid methyl ester/PC(15:2/0:0) PE(18:2/0:0)         | -0.58 | 0.003 | 0.01  | 15 |
| 27. MAG(20:5)/PC(15:2/0:0) PE(18:2/0:0)                             | -0.58 | 0.004 | 0.01  | 2  |
| 28. 7-Ketocholesterol/PC(15:2/0:0) PE(18:2/0:0)                     | -0.58 | 0.004 | 0.01  | 2  |
| 29. MAG(18:3)/2a-(3-Hydroxypropyl)-1a,25-dihydroxy-19-norvitamin D3 | -0.58 | 0.004 | 0.01  | 1  |
| 30. MAG(18:2)/LPC(0:0/18:2)                                         | -0.58 | 0.004 | 0.01  | 36 |
| 31. Deoxycholic acid/cis-5-Tetradecenoylcarnitine                   | 0.58  | 0.004 | 0.01  | 34 |
| 32. cis-5-Tetradecenoylcarnitine/2a-(3-                             | -0.58 | 0.005 | 0.02  | 1  |

|  |                                                               |       |       |      |    |
|--|---------------------------------------------------------------|-------|-------|------|----|
|  | Hydroxypropyl)-1a,25-dihydroxy-19-norvitamin D3               |       |       |      |    |
|  | 33. LPE(16:0)/Palmitic acid                                   | 0.58  | 0.005 | 0.02 | 2  |
|  | 34. Arachidonic acid ethyl ester/Biliverdin hydrochloride b   | 0.58  | 0.006 | 0.02 | 9  |
|  | 35. Myristic acid/Bilirubin II                                | -0.58 | 0.006 | 0.02 | 21 |
|  | 36. L-Carnitine/LPC(22:5)                                     | 0.67  | 0.006 | 0.02 | 12 |
|  | 37. Oleoyl-L-carnitine hydrochloride/PC(36:1)                 | 0.68  | 0.006 | 0.02 | 32 |
|  | 38. Alpha-Tocopherol/PC(36:1)                                 | -0.67 | 0.006 | 0.02 | 21 |
|  | 39. 3a-6b-7b-Trihydroxy-5b-cholanoic acid/PC(36:1)            | -0.66 | 0.006 | 0.02 | 5  |
|  | 40. 1-O-1'-(Z)-octadecenyl-2-hydroxy-sn-glycero-3-PE/PC(36:1) | -0.65 | 0.006 | 0.02 | 21 |
|  | 41. Heptadecanoic acid/SPM(40:2)                              | 0.64  | 0.007 | 0.02 | 22 |
|  | 42. Phenylalanine/SPM(40:2)                                   | 0.63  | 0.007 | 0.02 | 31 |
|  | 43. Ceramide PE(37:2) SPM(34:2)/SPM(40:2)                     | 0.62  | 0.007 | 0.02 | 15 |

|                                                                              |       |       |      |    |
|------------------------------------------------------------------------------|-------|-------|------|----|
| 44. PC(30:2)/SPM(40:2)                                                       | 0.62  | 0.007 | 0.02 | 26 |
| 45. N-palmitoyl-D-erythro-sphingosylphosphorylcholine/SPM(40:2)              | 0.63  | 0.007 | 0.02 | 29 |
| 46. Arachidonic acid/PC(35:3) PE(38:3)                                       | 0.62  | 0.007 | 0.02 | 15 |
| 47. Myristic acid/PC(36:5)                                                   | 0.61  | 0.007 | 0.02 | 18 |
| 48. 1-vaccenoyl-2-palmitoyl-sn-glycerol/SPM(40:2)                            | 0.61  | 0.008 | 0.02 | 39 |
| 49. Ceramide PE(33:1) SPM(30:1)/SPM(40:2)                                    | 0.60  | 0.008 | 0.02 | 42 |
| 50. Ceramide PE(34:1)/SPM(40:2)                                              | 0.60  | 0.008 | 0.02 | 12 |
| 51. 3-cis-Hydroxy-b-e-Caroten-3'-one/N-(9Z-octadecenoyl)-sphing-4-enine-1-PC | -0.59 | 0.008 | 0.02 | 25 |
| 52. Creatinine/1-Stearoyl-2-Hydroxy-sn-Glycero-3-PE                          | -0.58 | 0.009 | 0.02 | 26 |
| 53. MAG(18:2)/LPC(0:0/18:2)                                                  | -0.58 | 0.009 | 0.02 | 15 |
| 54. Deoxycholic acid/cis-5-Tetradecenoylcarnitine                            | -0.59 | 0.009 | 0.02 | 3  |



|                                                                                        |       |       |      |    |
|----------------------------------------------------------------------------------------|-------|-------|------|----|
| 55. cis-5-Tetradecenoylcarnitine/2a-(3-Hydroxypropyl)-1a,25-dihydroxy-19-norvitamin D3 | -0.57 | 0.009 | 0.02 | 15 |
| 56. LPC(0:0/20:4)/Biliverdin hydrochloride b                                           | -0.56 | 0.009 | 0.02 | 19 |
| 57. Lyso-PAF C-18/PC(34:3)                                                             | 0.57  | 0.01  | 0.02 | 26 |
| 58. PS(18:0)/PC(34:3)                                                                  | 0.56  | 0.01  | 0.02 | 2  |
| 59. LPC(18:3)/PC(34:3)                                                                 | 0.56  | 0.01  | 0.02 | 4  |
| 60. 6-hydroxy-5-cholestanol cholesterol/Ceramide PE(37:2) SPM(34:2)                    | -0.55 | 0.02  | 0.03 | 21 |
| 61. cis-5-Tetradecenoylcarnitine/Ceramide PE(37:2) SPM(34:2)                           | -0.55 | 0.02  | 0.03 | 10 |
| 62. Cholic acid/Ceramide PE(37:2) SPM(34:2)                                            | -0.52 | 0.05  | 0.08 | 11 |
| 63. MAG(18:2)/Ceramide PE(37:2) SPM(34:2)                                              | -0.53 | 0.07  | 0.13 | 11 |
| 64. MAG(18:1)-Ceramide PE(37:2) SPM(34:2)                                              | -0.52 | 0.09  | 0.15 | 6  |
| 65. Oleamide/PC(36:6)                                                                  | 0.51  | 0.10  | 0.16 | 9  |

|                                                                                |       |      |      |    |
|--------------------------------------------------------------------------------|-------|------|------|----|
| 66. Piperine/PC(36:6)                                                          | 0.52  | 0.10 | 0.16 | 15 |
| 67. dehydroepiandrosterone sulfate/PC(35:3) PE(38:3)                           | 0.51  | 0.10 | 0.16 | 12 |
| 68. Ceramide PE(35:2) SPM(32:2)/PC(30:1)                                       | 0.50  | 0.14 | 0.21 | 3  |
| 69. PC(28:2)/PC(30:1)                                                          | 0.50  | 0.14 | 0.21 | 12 |
| 70. Ceramide PE(35:1) SPM(32:1)/PC(30:1)                                       | 0.49  | 0.15 | 0.22 | 1  |
| 71. Hippuric acid – Barogenin                                                  | -0.48 | 0.25 | 0.25 | 5  |
| 72. L-Acetylcarnitine – Barogenin                                              | -0.47 | 0.17 | 0.25 | 4  |
| 73. Ceramide PE(34:1)/PC(30:1)                                                 | 0.46  | 0.19 | 0.27 | 7  |
| 74. LPC(22:4)-Ornithine                                                        | -0.43 | 0.19 | 0.27 | 16 |
| 75. Biliverdin hydrochloride b-Ornithine                                       | -0.42 | 0.20 | 0.27 | 14 |
| 76. Biliverdin hydrochloride a-Ornithine                                       | -0.40 | 0.20 | 0.27 | 12 |
| 77. LPE(18:2)/1-2-dioleoyl-sn-glycero-3-PC 1-2-dipetroselenoyl-sn-glycero-3-PC | 0.41  | 0.21 | 0.28 | 2  |
| 78. PC(15:2/0:0) PE(18:2/0:0)/1-2-dioleoyl-sn-glycero-3-PC 1-2-                | 0.40  | 0.22 | 0.29 | 1  |

|                                                                                                         |       |      |      |    |
|---------------------------------------------------------------------------------------------------------|-------|------|------|----|
| dipetroselenoyl-sn-glycero-3-PC                                                                         |       |      |      |    |
| 79. LPE(18:1)/1-2-dioleoyl-sn-glycero-3-PC 1-2-dipetroselenoyl-sn-glycero-3-PC                          | 0.39  | 0.23 | 0.30 | 2  |
| 80. 1-oleoyl-2-hydroxy-sn-glycero-3-PE/1-2-dioleoyl-sn-glycero-3-PC 1-2-dipetroselenoyl-sn-glycero-3-PC | -0.39 | 0.24 | 0.31 | 3  |
| 81. Stearic acid/Ornithine                                                                              | -0.38 | 0.25 | 0.32 | 4  |
| 82. Heptadecanoic acid/MAG(20:5)                                                                        | 0.37  | 0.27 | 0.34 | 54 |
| 83. MAG(16:0)/PC(35:4) PE(38:4)                                                                         | -0.36 | 0.30 | 0.38 | 1  |
| 84. 4,8 dimethylnonanoyl carnitine/2a-(3-Hydroxypropyl)-1a,25-dihydroxy-19-norvitamin D3                | 0.35  | 0.35 | 0.43 | 12 |
| 85. 3-Pyridylacetic acid trigonelline/1-2-dioleoyl-sn-glycero-3-PC 1-2-                                 | -0.35 | 0.37 | 0.45 | 1  |

|  |                                                                                           |       |      |       |   |
|--|-------------------------------------------------------------------------------------------|-------|------|-------|---|
|  | dipetroselenoyl-sn-glycero-3-PC                                                           |       |      |       |   |
|  | 86. Stachydrine/1-2-dioleoyl-sn-glycero-3-PC 1-2-dipetroselenoyl-sn-glycero-3-PC          | -0.34 | 0.39 | 0.47  | 3 |
|  | 87. Benzenebutanoic acid/1-2-dioleoyl-sn-glycero-3-PC 1-2-dipetroselenoyl-sn-glycero-3-PC | -0.34 | 0.40 | 0.49  | 5 |
|  | 88. Myristic acid/SPM(d18:2/18:1)                                                         | -0.33 | 0.45 | 0.53  | 6 |
|  | 89. LPC(0:0/16:1)/Ceramide PE(38:2)                                                       | -0.33 | 0.50 | 0.58  | 9 |
|  | 90. LPC(0:0/16:0)/Ceramide PE(38:2)                                                       | -0.32 | 0.51 | 0.59  | 4 |
|  | 91. LPC(18:3)/D-Urobilinogen I-Urobilin                                                   | 0.31  | 0.69 | 0.798 | 1 |
|  | 92. LPC(0:0/18:2)/D-Urobilinogen I-Urobilin                                               | 0.30  | 0.72 | 0.81  | 5 |
|  | 93. LPC(18:2/0:0)/D-Urobilinogen I-Urobilin                                               | 0.30  | 0.73 | 0.82  | 2 |

|                                                                                                                                |       |      |      |   |
|--------------------------------------------------------------------------------------------------------------------------------|-------|------|------|---|
| 94. 1-palmitoyl-2-hydroxy-sn-glycero-3-PC/cis/trans-Oleic acid                                                                 | -0.29 | 0.75 | 0.83 | 1 |
| 95. LPE(20:4)/cis/trans-Oleic acid                                                                                             | -0.29 | 0.77 | 0.84 | 3 |
| 96. PC(O-18:1/0:0) PC(P-18:0/0:0)/cis/trans-Oleic acid                                                                         | -0.28 | 0.79 | 0.86 | 6 |
| 97. LPC(18e:0/0:0)/cis/trans-Oleic acid                                                                                        | -0.28 | 0.81 | 0.87 | 5 |
| 98. LPC(22:5)-D-Urobilinogen I-Urobilin                                                                                        | -0.28 | 0.82 | 0.87 | 1 |
| 99. 5a-Androst-3-en-17-one/PC(35:4) PE(38:4)                                                                                   | -0.27 | 0.83 | 0.87 | 2 |
| 100. Decanoyl-L-Carnitine/PC(35:4) PE(38:4)                                                                                    | -0.24 | 0.91 | 0.93 | 1 |
| 101. 4-Androsten-11Beta-ol-3,17-dione 11-Hydroxy-4-androstene-3,17-dione/2a-(3-Hydroxypropyl)-1a-25-dihydroxy-19-norvitamin D3 | -0.23 | 0.91 | 0.93 | 1 |
| 102. Gamma-Caprolactone/1-2-dilinoleoyl-sn-glycero-3-PC                                                                        | -0.18 | 0.91 | 0.93 | 1 |

|                                 |                                                            |       |                    |                    |    |
|---------------------------------|------------------------------------------------------------|-------|--------------------|--------------------|----|
|                                 | 103. Deoxycholic acid<br>glycine conjugate/PC(32:1)        | -0.16 | 0.92               | 0.93               | 2  |
|                                 | 104. LPC(22:4)-Bilirubin II                                | 0.14  | 0.95               | 0.95               | 3  |
| <b>Men (n<sub>N</sub>=1078)</b> | 1. Arachidonic acid ethyl<br>ester/PC(35:4) PE(38:4)       | 0.92  | 1x10 <sup>-7</sup> | 2x10 <sup>-5</sup> | 2  |
|                                 | 2. Fatty acid C20:5 methyl<br>ester/PC(35:4) PE(38:4)      | 0.9   | 4x10 <sup>-7</sup> | 4x10 <sup>-5</sup> | 16 |
|                                 | 3. Cortisol/PC(35:4) PE(38:4)                              | 0.9   | 5x10 <sup>-7</sup> | 4x10 <sup>-5</sup> | 19 |
|                                 | 4. C16<br>Carnitine/PC(35:4) PE(38:4)                      | 0.9   | 7x10 <sup>-7</sup> | 4x10 <sup>-5</sup> | 6  |
|                                 | 5. 4,8 dimethylnonanoyl<br>carnitine/PC(35:4) PE(38:4)     | 0.88  | 2x10 <sup>-6</sup> | 9x10 <sup>-5</sup> | 45 |
|                                 | 6. Hippuric<br>acid/PC(34:5) PE(37:5)                      | 0.87  | 3x10 <sup>-6</sup> | 1x10 <sup>-4</sup> | 43 |
|                                 | 7. Deoxycholic acid glycine<br>conjugate/PC(35:4) PE(38:4) | 0.86  | 4x10 <sup>-6</sup> | 1x10 <sup>-4</sup> | 12 |
|                                 | 8. 1,3,7-Trimethyluric<br>acid/PC(34:5) PE(37:5)           | 0.86  | 5x10 <sup>-6</sup> | 1x10 <sup>-4</sup> | 10 |
|                                 | 9. Barogenin/PC(35:4) PE(38:4)                             | 0.86  | 5x10 <sup>-6</sup> | 1x10 <sup>-4</sup> | 8  |
|                                 | 10. 17-phenyl trinor Prostaglandin<br>E2 17-phenyl trinor  | 0.85  | 6x10 <sup>-6</sup> | 1x10 <sup>-4</sup> | 13 |

|                                                                                                   |      |                    |                    |    |
|---------------------------------------------------------------------------------------------------|------|--------------------|--------------------|----|
| Prostaglandin<br>D2/PC(35:4) PE(38:4)                                                             |      |                    |                    |    |
| 11. L-<br>Acetylcarnitine/PC(37:5) PE(40:5)                                                       | 0.85 | $7 \times 10^{-6}$ | $1 \times 10^{-4}$ | 55 |
| 12. L-Carnitine/PC(37:5) PE(40:5)                                                                 | 0.85 | $1 \times 10^{-5}$ | $2 \times 10^{-4}$ | 51 |
| 13. 2-Ketohexanoic<br>acid/PC(37:5) PE(40:5)                                                      | 0.84 | $1 \times 10^{-5}$ | $2 \times 10^{-4}$ | 0  |
| 14. Naproxen/PC(37:5) PE(40:5)                                                                    | 0.85 | $1 \times 10^{-5}$ | $2 \times 10^{-4}$ | 46 |
| 15. sodium<br>glycochenodeoxycholate/PC(35:4) PE(38:4)                                            | 0.84 | $1 \times 10^{-5}$ | $2 \times 10^{-4}$ | 2  |
| 16. Arachidonic acid ethyl<br>ester/2a-(3-Hydroxypropyl)-<br>1a,25-dihydroxy-19-<br>norvitamin D3 | 0.83 | $2 \times 10^{-5}$ | $2 \times 10^{-4}$ | 35 |
| 17. MAG(16:1)/2a-(3-<br>Hydroxypropyl)-1a,25-<br>dihydroxy-19-norvitamin D3                       | 0.83 | $2 \times 10^{-5}$ | $2 \times 10^{-4}$ | 12 |
| 18. 1-oleoyl-2-hydroxy-sn-<br>glycero-3-PE/<br>2a-(3-Hydroxypropyl)-1a-25                         | 0.83 | $2 \times 10^{-5}$ | $2 \times 10^{-4}$ | 2  |

|                                                                                   |      |                    |                    |    |
|-----------------------------------------------------------------------------------|------|--------------------|--------------------|----|
| -dihydroxy-19-norvitamin<br>D3                                                    |      |                    |                    |    |
| 19. Indole-3-<br>carbinol/PC(37:5) PE(40:5)                                       | 0.82 | $2 \times 10^{-5}$ | $2 \times 10^{-4}$ | 41 |
| 20. L-<br>Phenylalanine/PC(37:5) PE(40:<br>5)                                     | 0.83 | $2 \times 10^{-5}$ | $2 \times 10^{-4}$ | 26 |
| 21. L-<br>Tryptophan/PC(37:5) PE(40:5)                                            | 0.83 | $2 \times 10^{-5}$ | $2 \times 10^{-4}$ | 11 |
| 22. Caffeine/PC(34:5) PE(37:5)                                                    | 0.84 | $2 \times 10^{-5}$ | $2 \times 10^{-4}$ | 2  |
| 23. cis-5-<br>Tetradecenoylcarnitine/PC(35:<br>4) PE(38:4)                        | 0.83 | $2 \times 10^{-5}$ | $2 \times 10^{-4}$ | 13 |
| 24. Cholic acid/PC(35:4) PE(38:4)                                                 | 0.83 | $2 \times 10^{-5}$ | $2 \times 10^{-4}$ | 27 |
| 25. LPE(18:0)/ 2a-(3-<br>Hydroxypropyl)-1a,25-<br>dihydroxy-19-norvitamin D3      | 0.82 | $3 \times 10^{-5}$ | $3 \times 10^{-4}$ | 16 |
| 26. S-(4,5-Dihydro-2-methyl-3-<br>furanyl)<br>ethanethioate/PC(37:5) PE(40:<br>5) | 0.82 | $3 \times 10^{-5}$ | $3 \times 10^{-4}$ | 1  |
| 27. Treprostiniil/PC(35:4) PE(38:4)                                               | 0.82 | $3 \times 10^{-5}$ | $3 \times 10^{-4}$ | 1  |



|                                                                                          |       |                    |                    |    |
|------------------------------------------------------------------------------------------|-------|--------------------|--------------------|----|
| 28. Stearic acid/PC(35:4) PE(38:4)                                                       | 0.82  | $3 \times 10^{-5}$ | $3 \times 10^{-4}$ | 1  |
| 29. Linoleic acid/2a-(3-Hydroxypropyl)-1a,25-dihydroxy-19-norvitamin D3                  | 0.81  | $4 \times 10^{-5}$ | $3 \times 10^{-4}$ | 2  |
| 30. Barogenin/2a-(3-Hydroxypropyl)-1a,25-dihydroxy-19-norvitamin D3                      | 0.79  | $4 \times 10^{-5}$ | $3 \times 10^{-4}$ | 12 |
| 31. MAG(18:3)/PC(35:4) PE(38:4)                                                          | 0.83  | $4 \times 10^{-5}$ | $3 \times 10^{-4}$ | 6  |
| 32. Heptadecanoic acid/MAG(20:5)                                                         | -0.79 | $5 \times 10^{-5}$ | $4 \times 10^{-4}$ | 5  |
| 33. MAG(16:0)/PC(35:4) PE(38:4)                                                          | 0.79  | $5 \times 10^{-5}$ | $4 \times 10^{-4}$ | 38 |
| 34. 4,8 dimethylnonanoyl carnitine/2a-(3-Hydroxypropyl)-1a,25-dihydroxy-19-norvitamin D3 | 0.78  | $5 \times 10^{-5}$ | $4 \times 10^{-4}$ | 42 |
| 35. 10-nitro-9E-octadecenoic acid 9-nitro-9E-octadecenoic acid/PE(38:4)                  | 0.78  | $6 \times 10^{-5}$ | $4 \times 10^{-4}$ | 16 |
| 36. Prostaglandin J2/PC(35:4) PE(38:4)                                                   | 0.78  | $6 \times 10^{-5}$ | $4 \times 10^{-4}$ | 11 |
| 37. PC(O-18:1/0:0) PC(P-18:0/0:0)/LPC(20:1)                                              | -0.76 | $6 \times 10^{-5}$ | $4 \times 10^{-4}$ | 54 |

|                                                                                                                               |      |                    |                    |    |
|-------------------------------------------------------------------------------------------------------------------------------|------|--------------------|--------------------|----|
| 38. Oleoyl-L-carnitine hydrochloride/2a-(3-Hydroxypropyl)-1a,25-dihydroxy-19-norvitamin D3                                    | 0.73 | $7 \times 10^{-5}$ | $4 \times 10^{-4}$ | 36 |
| 39. Pantothenic acid/PC(35:4) PE(38:4)                                                                                        | 0.73 | $7 \times 10^{-5}$ | $4 \times 10^{-4}$ | 10 |
| 40. 5a-Androst-3-en-17-one/PC(35:4) PE(38:4)                                                                                  | 0.73 | $7 \times 10^{-5}$ | $4 \times 10^{-4}$ | 12 |
| 41. Decanoyl-L-Carnitine/PC(35:4) PE(38:4)                                                                                    | 0.73 | $7 \times 10^{-5}$ | $4 \times 10^{-4}$ | 5  |
| 42. 4-Androsten-11Beta-ol-3,17-dione 11-Hydroxy-4-androstene-3,17-dione/2a-(3-Hydroxypropyl)-1a-25-dihydroxy-19-norvitamin D3 | 0.72 | $8 \times 10^{-5}$ | $4 \times 10^{-4}$ | 52 |
| 43. MAG(18:2)/PC(35:4) PE(38:4)                                                                                               | 0.71 | $8 \times 10^{-5}$ | $4 \times 10^{-4}$ | 54 |
| 44. L-Octanoylcarnitine/LPC(22:5)                                                                                             | 0.70 | $8 \times 10^{-5}$ | $4 \times 10^{-4}$ | 10 |
| 45. 1-linoleoyl-2-stearoyl-sn-glycerol/Ceramide PE(36:2)                                                                      | 0.70 | $9 \times 10^{-5}$ | $5 \times 10^{-4}$ | 12 |
| 46. PC(15:2/0:0) PE(18:2/0:0)/PC(30:1)                                                                                        | 0.70 | $1 \times 10^{-4}$ | $5 \times 10^{-4}$ | 36 |

|                                                                          |       |                    |                    |    |
|--------------------------------------------------------------------------|-------|--------------------|--------------------|----|
| 47. Flavone/PC(35:4) PE(38:4)                                            | 0.70  | $1 \times 10^{-4}$ | $5 \times 10^{-4}$ | 22 |
| 48. Butyryl-L-carnitine Isobutyryl-L-carnitine/PE(38:4)                  | 0.70  | $1 \times 10^{-4}$ | $5 \times 10^{-4}$ | 24 |
| 49. L-Carnitine/LPC(22:5)                                                | 0.70  | $2 \times 10^{-4}$ | 0.001              | 35 |
| 50. 10-nitro-9E-octadecenoic acid 9-nitro-9E-octadecenoic acid/LPC(22:5) | 0.70  | $2 \times 10^{-4}$ | 0.001              | 5  |
| 51. LPC(18e:0/0:0)/PC(40:6)                                              | 0.69  | $2 \times 10^{-4}$ | 0.001              | 10 |
| 52. Lyso-PAF C-18/PC(40:6)                                               | 0.69  | $3 \times 10^{-4}$ | 0.001              | 2  |
| 53. PS(18:0)/PC(40:6)                                                    | 0.68  | $3 \times 10^{-4}$ | 0.001              | 6  |
| 54. LPC(18:3)/PC(40:6)                                                   | 0.69  | $3 \times 10^{-4}$ | 0.001              | 0  |
| 55. LPC(0:0/18:2)-PC(40:6)                                               | 0.68  | $3 \times 10^{-4}$ | 0.001              | 24 |
| 56. Flavone/SPM(42:3)                                                    | -0.68 | $4 \times 10^{-4}$ | 0.002              | 23 |
| 57. Butyryl-L-carnitine Isobutyryl-L-carnitine/SPM(42:3)                 | -0.67 | $5 \times 10^{-4}$ | 0.002              | 14 |
| 58. Geranyl acetoacetate/SPM(42:3)                                       | -0.67 | $5 \times 10^{-4}$ | 0.002              | 6  |
| 59. N-(9Z-octadecenoyl)-sphing-4-enine-1-PC/SPM(42:3)                    | -0.68 | $5 \times 10^{-4}$ | 0.002              | 1  |
| 60. 1-2-dipalmitoleoyl-sn-glycero-3-PC/SPM(42:3)                         | -0.66 | $5 \times 10^{-4}$ | 0.002              | 3  |

|                                                                                        |       |                    |       |    |
|----------------------------------------------------------------------------------------|-------|--------------------|-------|----|
| 61. Bilirubin I/LacCer(d18:1/14:0)                                                     | 0.69  | $6 \times 10^{-4}$ | 0.002 | 12 |
| 62. PC(32:1)-SPM(42:3)                                                                 | -0.65 | $8 \times 10^{-4}$ | 0.003 | 17 |
| 63. L-Carnitine/LPC(22:5)                                                              | -0.68 | $9 \times 10^{-4}$ | 0.003 | 9  |
| 64. Bilirubin II/PC(34:2) PE(37:2)                                                     | 0.69  | $9 \times 10^{-4}$ | 0.003 | 4  |
| 65. S-(4-5-Dihydro-2-methyl-3-furanyl)ethanethioate/PC(40:5)                           | 0.67  | $9 \times 10^{-4}$ | 0.003 | 0  |
| 66. L-Carnitine/PC(40:5)                                                               | 0.69  | 0.001              | 0.004 | 11 |
| 67. L-Phenylalanine/PC(40:5)                                                           | 0.68  | 0.001              | 0.004 | 1  |
| 68. Treprostinil/ LPC(0:0/18:2)                                                        | -0.68 | 0.001              | 0.004 | 9  |
| 69. LPC(0:0/20:5)/1,2-dipalmitoleoyl-sn-glycero-3-PC                                   | -0.67 | 0.001              | 0.004 | 19 |
| 70. DL-2-Aminooctanoic acid/LPE(18:1)                                                  | 0.65  | 0.005              | 0.02  | 21 |
| 71. 1-O-1'-(Z)-octadecenyl-2-hydroxy-sn-glycero-3-PE/LPC(0:0/18:2)                     | -0.67 | 0.005              | 0.02  | 17 |
| 72. 1-O-1'-(Z)-octadecenyl-2-hydroxy-sn-glycero-3-PE/1-2-dioleoyl-sn-glycero-3-PC 1-2- | 0.66  | 0.006              | 0.02  | 7  |

|  |                                                                                                         |       |       |      |    |
|--|---------------------------------------------------------------------------------------------------------|-------|-------|------|----|
|  | dipetroselenoyl-sn-glycero-3-PC                                                                         |       |       |      |    |
|  | 73. LPE(18:2)/1-2-dioleoyl-sn-glycero-3-PC 1-2-dipetroselenoyl-sn-glycero-3-PC                          | -0.68 | 0.007 | 0.02 | 4  |
|  | 74. PC(15:2/0:0) PE(18:2/0:0)/1-2-dioleoyl-sn-glycero-3-PC 1-2-dipetroselenoyl-sn-glycero-3-PC          | -0.66 | 0.007 | 0.02 | 2  |
|  | 75. LPE(18:1)/1-2-dioleoyl-sn-glycero-3-PC 1-2-dipetroselenoyl-sn-glycero-3-PC                          | -0.65 | 0.007 | 0.02 | 3  |
|  | 76. 1-oleoyl-2-hydroxy-sn-glycero-3-PE/1-2-dioleoyl-sn-glycero-3-PC 1-2-dipetroselenoyl-sn-glycero-3-PC | 0.65  | 0.008 | 0.02 | 1  |
|  | 77. Lyso-PAF C-18/PC(34:3)                                                                              | -0.64 | 0.008 | 0.02 | 3  |
|  | 78. PS(18:0)/PC(34:3)                                                                                   | -0.63 | 0.008 | 0.02 | 1  |
|  | 79. LPC(18:3)/PC(34:3)                                                                                  | -0.62 | 0.008 | 0.02 | 10 |

|                                                               |       |       |      |    |
|---------------------------------------------------------------|-------|-------|------|----|
| 80. e-Caprolactam/1-2-dilinoleoyl-sn-glycero-3-PC             | 0.61  | 0.008 | 0.02 | 12 |
| 81. DL-2-Aminooctanoic acid/1-2-dilinoleoyl-sn-glycero-3-PC   | 0.62  | 0.009 | 0.03 | 13 |
| 82. Gamma-Caprolactone/1-2-dilinoleoyl-sn-glycero-3-PC        | 0.61  | 0.009 | 0.03 | 12 |
| 83. Deoxycholic acid glycine conjugate/PC(32:1)               | 0.60  | 0.009 | 0.03 | 20 |
| 84. Choline/PC(34:3)                                          | -0.60 | 0.01  | 0.03 | 4  |
| 85. Creatinine/PC(34:3)                                       | -0.61 | 0.01  | 0.03 | 6  |
| 86. e-Caprolactam/PC(34:3)                                    | -0.59 | 0.02  | 0.06 | 0  |
| 87. DL-2-Aminooctanoic acid/PC(34:3)                          | -0.62 | 0.02  | 0.06 | 1  |
| 88. Oleoyl-L-carnitine hydrochloride/PC(36:1)                 | -0.58 | 0.02  | 0.06 | 22 |
| 89. Alpha-Tocopherol/3a-6b-7b-Trihydroxy-5b-cholanoic acid    | -0.62 | 0.03  | 0.08 | 12 |
| 90. 3a-6b-7b-Trihydroxy-5b-cholanoic acid/PC(36:1)            | -0.61 | 0.03  | 0.08 | 13 |
| 91. 1-O-1'-(Z)-octadecenyl-2-hydroxy-sn-glycero-3-PE/PC(36:1) | -0.62 | 0.03  | 0.08 | 5  |

|                                                                          |       |      |      |    |
|--------------------------------------------------------------------------|-------|------|------|----|
| 92. MAG(20:5)/N-(octadecanoyl)-sphing-4-enine-1-PC                       | 0.58  | 0.03 | 0.08 | 4  |
| 93. Acetaminophen/PC(32:1)                                               | 0.57  | 0.03 | 0.08 | 2  |
| 94. 2-Ketohexanoic acid/PC(32:1)                                         | 0.57  | 0.04 | 0.10 | 6  |
| 95. S-(4-5-Dihydro-2-methyl-3-furanyl)ethanethioate/PC(32:1)             | 0.57  | 0.04 | 0.10 | 7  |
| 96. L-Carnitine/PC(32:1)                                                 | 0.56  | 0.04 | 0.10 | 1  |
| 97. e-Caprolactam/Gamma-Caprolactone                                     | -0.53 | 0.04 | 0.10 | 5  |
| 98. DL-2-Aminooctanoic acid/Gamma-Caprolactone                           | -0.52 | 0.04 | 0.10 | 2  |
| 99. e-Caprolactam/L-Proline                                              | -0.50 | 0.05 | 0.12 | 3  |
| 100. DL-2-Aminooctanoic acid/L-Proline                                   | 0.51  | 0.05 | 0.12 | 3  |
| 101. gamma-Glutamyl-leucine/1-2-dipalmitoleoyl-sn-glycero-3-PC           | -0.50 | 0.05 | 0.12 | 4  |
| 102. 3-Pyridylacetic acid trigonelline/1-2-dioleoyl-sn-glycero-3-PC 1-2- | 0.50  | 0.09 | 0.21 | 14 |

|      |                                                                                       |       |      |      |    |
|------|---------------------------------------------------------------------------------------|-------|------|------|----|
|      | dipetroselenoyl-sn-glycero-3-PC                                                       |       |      |      |    |
| 103. | Stachydrine/1-2-dioleoyl-sn-glycero-3-PC 1-2-dipetroselenoyl-sn-glycero-3-PC          | 0.51  | 0.10 | 0.23 | 6  |
| 104. | Benzenebutanoic acid/1-2-dioleoyl-sn-glycero-3-PC 1-2-dipetroselenoyl-sn-glycero-3-PC | 0.52  | 0.11 | 0.25 | 8  |
| 105. | C12 Carnitine/1-2-dipalmitoleoyl-sn-glycero-3-PC                                      | -0.51 | 0.11 | 0.25 | 15 |
| 106. | Corticosterone/1-2-dipalmitoleoyl-sn-glycero-3-PC                                     | -0.52 | 0.12 | 0.27 | 0  |
| 107. | LPC(0:0/16:1)/N-(9Z-octadecenoyl)-sphing-4-enine-1-PC                                 | 0.52  | 0.12 | 0.27 | 11 |
| 108. | LPC(16:1/0:0)/N-(9Z-octadecenoyl)-sphing-4-enine-1-PC                                 | 0.51  | 0.12 | 0.27 | 2  |



|      |                                                       |       |      |      |    |
|------|-------------------------------------------------------|-------|------|------|----|
| 109. | LPC(0:0/16:0)/N-(9Z-octadecenoyl)-sphing-4-enine-1-PC | 0.49  | 0.13 | 0.28 | 13 |
| 110. | Heptadecanoic acid/SPM(40:2)                          | 0.48  | 0.13 | 0.28 | 27 |
| 111. | Phenylalanine/SPM(40:2)                               | 0.48  | 0.13 | 0.28 | 16 |
| 112. | Decanoyl-L-carnitine/SPM(40:2)                        | -0.48 | 0.13 | 0.28 | 1  |
| 113. | 5 $\alpha$ -Androst-3-en-17-one/SPM(d18:2/18:1)       | 0.49  | 0.14 | 0.29 | 1  |
| 114. | Propranolol/SPM(d18:2/18:1)                           | 0.49  | 0.14 | 0.29 | 1  |
| 115. | gamma-Glutamyl-leucine/SPM(d18:2/18:1)                | -0.47 | 0.14 | 0.29 | 2  |
| 116. | Myristic acid/SPM(d18:2/18:1)                         | -0.47 | 0.14 | 0.29 | 12 |
| 117. | LPC(0:0/16:1)/Ceramide PE(38:2)                       | 0.46  | 0.15 | 0.30 | 23 |
| 118. | LPC(16:1/0:0)/Ceramide PE(38:2)                       | 0.46  | 0.15 | 0.30 | 6  |

|      |                                                           |       |      |      |    |
|------|-----------------------------------------------------------|-------|------|------|----|
| 119. | LPC(0:0/16:0)-<br>Ceramide PE(38:2)                       | 0.45  | 0.15 | 0.30 | 9  |
| 120. | Oleamide/PC(36:6)                                         | -0.42 | 0.18 | 0.36 | 14 |
| 121. | Piperine/PC(36:6)                                         | -0.43 | 0.22 | 0.44 | 2  |
| 122. | dehydroepiandrosterone<br>sulfate/PC(35:3) PE(38:3)       | -0.45 | 0.25 | 0.50 | 5  |
| 123. | LPC(22:4)/Ornithine                                       | -0.44 | 0.26 | 0.51 | 1  |
| 124. | Biliverdin<br>hydrochloride b/Ornithine                   | -0.44 | 0.26 | 0.51 | 1  |
| 125. | Biliverdin<br>hydrochloride a/Ornithine                   | -0.42 | 0.27 | 0.51 | 1  |
| 126. | LPC(22:4)-Bilirubin II                                    | -0.41 | 0.27 | 0.51 | 2  |
| 127. | 6-hydroxy-5-<br>cholestanol cholesterol/LPC(20<br>:5/0:0) | -0.40 | 0.27 | 0.51 | 4  |
| 128. | cis-5-<br>Tetradecenoylcarnitine/LPC(20<br>:5/0:0)        | -0.40 | 0.27 | 0.51 | 12 |
| 129. | cis/trans-Oleic<br>acid/PC(30:2)                          | 0.40  | 0.28 | 0.51 | 10 |
| 130. | 1-linoleoyl-2-stearoyl-<br>sn-glycerol/PC(30:2)           | 0.39  | 0.28 | 0.51 | 2  |

|      |                                                                                                      |       |      |      |    |
|------|------------------------------------------------------------------------------------------------------|-------|------|------|----|
| 131. | 1-vaccenoyl-2-palmitoyl-sn-glycerol/PC(30:2)                                                         | 0.38  | 0.28 | 0.51 | 6  |
| 132. | Ceramide<br>PE(33:1) SPM(30:1)/PC(30:2)                                                              | -0.39 | 0.28 | 0.51 | 12 |
| 133. | Arachidonic acid/1-arachidoyl-2-hydroxy-sn-glycero-3-PC                                              | -0.37 | 0.28 | 0.51 | 3  |
| 134. | Heptadecanoic acid/1-arachidoyl-2-hydroxy-sn-glycero-3-PC                                            | -0.37 | 0.28 | 0.51 | 1  |
| 135. | SPM(30:1)/PC(30:2)/1-arachidoyl-2-hydroxy-sn-glycero-3-PC                                            | -0.36 | 0.29 | 0.52 | 1  |
| 136. | Decanoyl-L-carnitine-1-arachidoyl-2-hydroxy-sn-glycero-3-phosphocholine                              | -0.35 | 0.29 | 0.52 | 1  |
| 137. | 2-6 dimethylheptanoyl carnitine/3-cis-Hydroxy-b-e-Caroten-3'-one                                     | 0.34  | 0.30 | 0.52 | 2  |
| 138. | 4-Androsten-11Beta-ol-3-17-dione 11-Hydroxy-4-androstene-3-17-dione/3-cis-Hydroxy-b-e-Caroten-3'-one | 0.34  | 0.30 | 0.52 | 5  |

|      |                                                   |       |      |      |   |
|------|---------------------------------------------------|-------|------|------|---|
| 139. | Arachidonic acid/3-cis-Hydroxy-b-e-Caroten-3'-one | 0.33  | 0.30 | 0.52 | 2 |
| 140. | Decanoyl-L-carnitine/LPC(0:0/18:2)                | 0.34  | 0.33 | 0.56 | 2 |
| 141. | LPC(0:0/20:5)/1,2-dipalmitoleoyl-sn-glycero-3-PC  | -0.34 | 0.33 | 0.56 | 3 |
| 142. | DL-2-Amino-octanoic acid/LPE(18:1)                | -0.33 | 0.33 | 0.56 | 1 |
| 143. | MAG(18:3)/3-cis-Hydroxy-b-e-Caroten-3'-one        | 0.31  | 0.33 | 0.56 | 1 |
| 144. | Cholic acid/Ornithine                             | -0.31 | 0.33 | 0.56 | 2 |
| 145. | MAG(18:2)/Ornithine                               | -0.31 | 0.34 | 0.57 | 4 |
| 146. | MAG(18:1)/Ornithine                               | -0.30 | 0.35 | 0.58 | 1 |
| 147. | Stearic acid/Ornithine                            | -0.30 | 0.42 | 0.69 | 1 |
| 148. | L-Proline/Lyso-PAF C-18                           | 0.31  | 0.43 | 0.70 | 5 |
| 149. | Betaine/Lyso-PAF C-18                             | 0.29  | 0.44 | 0.72 | 6 |
| 150. | Salicylic acid Aspirin/Lyso-PAF C-18              | 0.30  | 0.45 | 0.72 | 8 |

|      |                                                                                            |       |      |      |   |
|------|--------------------------------------------------------------------------------------------|-------|------|------|---|
| 151. | Prostaglandin<br>J2/LPC(20:1)                                                              | -0.29 | 0.45 | 0.72 | 2 |
| 152. | Hyodeoxycholic<br>acid/LPC(20:1)                                                           | -0.32 | 0.45 | 0.72 | 2 |
| 153. | Deoxycholic<br>acid/LPC(20:1)                                                              | -0.34 | 0.48 | 0.75 | 1 |
| 154. | Cortisol/LPC(20:1)                                                                         | -0.32 | 0.48 | 0.75 | 1 |
| 155. | 4-8 dimethylnonanoyl<br>carnitine/LPC(0:0/16:0)                                            | -0.29 | 0.48 | 0.75 | 1 |
| 156. | Arachidonic acid ethyl<br>ester/LPC(0:0/16:0)                                              | -0.29 | 0.49 | 0.76 | 1 |
| 157. | MAG(18:0)/LPC(0:0/1<br>6:0)                                                                | -0.28 | 0.50 | 0.76 | 1 |
| 158. | 17-phenyl trinor<br>Prostaglandin E2 17-phenyl<br>trinor Prostaglandin<br>D2/LPC(16:1/0:0) | 0.27  | 0.50 | 0.76 | 1 |
| 159. | Sodium<br>glycochenodeoxycholate/LPC(<br>16:1/0:0)                                         | 0.28  | 0.50 | 0.76 | 1 |

|      |                                                                   |       |      |      |    |
|------|-------------------------------------------------------------------|-------|------|------|----|
| 160. | Deoxycholic acid<br>glycine<br>conjugate/LPC(16:1/0:0)            | 0.29  | 0.55 | 0.83 | 3  |
| 161. | Chenodeoxycholic<br>acid/LPC(16:1/0:0)                            | 0.28  | 0.60 | 0.89 | 1  |
| 162. | LPC(22:5)/D-<br>Urobilinogen I-Urobilin                           | -0.26 | 0.60 | 0.89 | 2  |
| 163. | MAG(16:0)/LPC(16:1/<br>0:0)                                       | 0.25  | 0.60 | 0.89 | 15 |
| 164. | Ceramide<br>PE(35:2) SPM(32:2)/PC(30:1)                           | 0.27  | 0.62 | 0.89 | 1  |
| 165. | PC(28:2)/PC(30:1)                                                 | -0.26 | 0.62 | 0.91 | 2  |
| 166. | Ceramide<br>PE(35:1) SPM(32:1)/PC(30:1)                           | 0.26  | 0.63 | 0.91 | 3  |
| 167. | PC(30:1)/SPM(40:2)                                                | -0.26 | 0.63 | 0.92 | 1  |
| 168. | Deoxycholic acid<br>glycine<br>conjugate/Chenodeoxycholic<br>acid | 0.24  | 0.65 | 0.92 | 1  |
| 169. | Fatty acid C20:5 methyl<br>ester/PC(34:5) PE(37:5)                | 0.25  | 0.65 | 0.93 | 1  |

|      |                                                                                          |       |      |      |    |
|------|------------------------------------------------------------------------------------------|-------|------|------|----|
| 170. | PC(28:2)/ 1-oleoyl-2-palmitoyl-sn-glycero-3-PC                                           | 0.28  | 0.67 | 0.93 | 1  |
| 171. | PC(28:2)/PC(34:0)                                                                        | -0.25 | 0.67 | 0.95 | 3  |
| 172. | L-Phenylalanine/LPC(0:0/16:1)                                                            | 0.21  | 0.67 | 0.95 | 2  |
| 173. | Uric acid/LPC(0:0/16:1)                                                                  | 0.21  | 0.69 | 0.95 | 2  |
| 174. | PC(32:1)/PC(35:3) PE(38:3)                                                               | -0.24 | 0.69 | 0.95 | 2  |
| 175. | Stearic acid/Palmitic acid                                                               | 0.22  | 0.69 | 0.95 | 3  |
| 176. | Stearic acid/cis/trans-Oleic acid                                                        | 0.22  | 0.70 | 0.95 | 4  |
| 177. | Ceramide PE(35:2) SPM(32:2)/PC(32:1)                                                     | -0.24 | 0.70 | 0.95 | 4  |
| 178. | PC(28:2)/PC(32:1)                                                                        | -0.24 | 0.70 | 0.95 | 1  |
| 179. | Deoxycholic acid glycine conjugate/2a-(3-Hydroxypropyl)-1a-25-dihydroxy-19-norvitamin D3 | -0.22 | 0.70 | 0.95 | 12 |
| 180. | Chenodeoxycholic acid/2a-(3-Hydroxypropyl)-1a-                                           | -0.22 | 0.71 | 0.95 | 1  |

|      |                                                                                        |       |      |      |    |
|------|----------------------------------------------------------------------------------------|-------|------|------|----|
|      | 25-dihydroxy-19-norvitamin D3                                                          |       |      |      |    |
| 181. | Linoleyl carnitine/2a-(3-Hydroxypropyl)-1a-25-dihydroxy-19-norvitamin D3               | -0.22 | 0.71 | 0.95 | 2  |
| 182. | Oleoyl-L-carnitine hydrochloride/2a-(3-Hydroxypropyl)-1a-25-dihydroxy-19-norvitamin D3 | -0.23 | 0.71 | 0.95 | 2  |
| 183. | Alpha-Tocopherol/2a-(3-Hydroxypropyl)-1a-25-dihydroxy-19-norvitamin D3                 | -0.22 | 0.72 | 0.95 | 8  |
| 184. | cis-5-Tetradecenoylcarnitine/LPC(0:0/16:1)                                             | 0.21  | 0.72 | 0.95 | 7  |
| 185. | Cholic acid/LPC(0:0/16:1)                                                              | 0.22  | 0.72 | 0.95 | 11 |
| 186. | MAG(18:2)/LPC(0:0/16:1)                                                                | 0.22  | 0.73 | 0.95 | 1  |
| 187. | MAG(18:1)/LPC(0:0/16:1)                                                                | 0.22  | 0.74 | 0.96 | 2  |
| 188. | LPE(18:0)/1-Stearoyl-2-Hydroxy-sn-Glycero-3-PE                                         | 0.21  | 0.74 | 0.96 | 3  |



|      |                                                                  |       |      |      |    |
|------|------------------------------------------------------------------|-------|------|------|----|
| 189. | Choline/2a-(3-Hydroxypropyl)-1a-25-dihydroxy-19-norvitamin D3    | -0.21 | 0.75 | 0.96 | 1  |
| 190. | Creatinine/2a-(3-Hydroxypropyl)-1a-25-dihydroxy-19-norvitamin D3 | -0.21 | 0.75 | 0.96 | 1  |
| 191. | Fatty acid C22:6/PC(15:2/0:0) PE(18:2/0:0)                       | 0.20  | 0.77 | 0.97 | 1  |
| 192. | 4-8 dimethylnonanoyl carnitine/PC(15:2/0:0) PE(18:2/0:0)         | 0.21  | 0.77 | 0.97 | 5  |
| 193. | Arachidonic acid ethyl ester/PC(15:2/0:0) PE(18:2/0:0)           | 0.21  | 0.78 | 0.97 | 3  |
| 194. | MAG(18:0)/PC(15:2/0:0) PE(18:2/0:0)                              | 0.20  | 0.78 | 0.97 | 1  |
| 195. | Cholic acid/PC(15:2/0:0) PE(18:2/0:0)                            | 0.20  | 0.80 | 0.97 | 12 |
| 196. | 1-palmitoyl-2-hydroxy-sn-glycero-3-PC/cis/trans-Oleic acid       | -0.20 | 0.80 | 0.97 | 4  |

|      |                                                    |       |      |      |   |
|------|----------------------------------------------------|-------|------|------|---|
| 197. | LPE(20:4)/cis/trans-Oleic acid                     | -0.20 | 0.81 | 0.97 | 2 |
| 198. | PC(O-18:1/0:0) PC(P-18:0/0:0)/cis/trans-Oleic acid | -0.22 | 0.81 | 0.97 | 3 |
| 199. | LPC(18e:0/0:0)/cis/trans-Oleic acid                | -0.22 | 0.81 | 0.97 | 8 |
| 200. | LPE(16:0)/1-palmitoyl-2-hydroxy-sn-glycero-3-PE    | 0.22  | 0.82 | 0.97 | 7 |
| 201. | Choline/GCA                                        | -0.20 | 0.82 | 0.97 | 7 |
| 202. | Creatinine/GCA                                     | -0.19 | 0.82 | 0.97 | 6 |
| 203. | e-Caprolactam/GCA                                  | -0.19 | 0.84 | 0.97 | 2 |
| 204. | DL-2-Aminooctanoic acid/GCA                        | -0.18 | 0.84 | 0.97 | 2 |
| 205. | Gamma-Caprolactone/GCA                             | -0.18 | 0.84 | 0.97 | 2 |
| 206. | C12 Carnitine/Gamma-Tocopherol                     | 0.20  | 0.85 | 0.97 | 1 |
| 207. | Corticosterone/Gamma-Tocopherol                    | 0.21  | 0.85 | 0.97 | 2 |
| 208. | MAG(16:1)/Gamma-Tocopherol                         | 0.22  | 0.85 | 0.97 | 1 |

|      |                                                              |       |      |      |   |
|------|--------------------------------------------------------------|-------|------|------|---|
| 209. | MAG(16:0)/Gamma-Tocopherol                                   | 0.22  | 0.85 | 0.97 | 1 |
| 210. | Myristic acid/LPE(18:0)                                      | -0.23 | 0.87 | 0.97 | 1 |
| 211. | Alpha-Linolenic acid/LPE(18:0)                               | -0.24 | 0.87 | 0.97 | 3 |
| 212. | L-Aspartyl-L-phenylalanine/LPE(18:0)                         | -0.24 | 0.87 | 0.97 | 2 |
| 213. | Propranolol/3a-6b-7b-Trihydroxy-5b-cholanoic acid            | 0.22  | 0.90 | 0.97 | 1 |
| 214. | gamma-Glutamyl-leucine/3a-6b-7b-Trihydroxy-5b-cholanoic acid | 0.21  | 0.90 | 0.97 | 1 |
| 215. | Myristic acid/3a-6b-7b-Trihydroxy-5b-cholanoic acid          | 0.20  | 0.90 | 0.97 | 1 |
| 216. | Alpha-Linolenic acid/3a-6b-7b-Trihydroxy-5b-cholanoic acid   | 0.22  | 0.90 | 0.97 | 1 |
| 217. | 2-Ketohexanoic acid/Alpha-Tocopherol                         | 0.20  | 0.91 | 0.97 | 1 |
| 218. | C12 Carnitine/PC(30:1)                                       | -0.20 | 0.91 | 0.97 | 2 |

|      |                                                     |       |      |      |   |
|------|-----------------------------------------------------|-------|------|------|---|
| 219. | Corticosterone/PC(30:1)<br>)                        | -0.21 | 0.91 | 0.97 | 2 |
| 220. | MAG(16:1)/PC(30:1)                                  | -0.21 | 0.91 | 0.97 | 2 |
| 221. | MAG(16:0)/PC(30:1)                                  | -0.22 | 0.92 | 0.97 | 1 |
| 222. | L-Carnitine/Linoleyl<br>carnitine                   | -0.20 | 0.92 | 0.97 | 1 |
| 223. | L-<br>Phenylalanine/Linoleyl<br>carnitine           | -0.18 | 0.92 | 0.97 | 1 |
| 224. | Uric acid/Linoleyl<br>carnitine                     | -0.19 | 0.92 | 0.97 | 1 |
| 225. | Indoleacetic<br>acid/Linoleyl carnitine             | -0.18 | 0.92 | 0.97 | 2 |
| 226. | Paraxanthine Theophyll<br>ine/Linoleyl carnitine    | -0.17 | 0.93 | 0.97 | 1 |
| 227. | MAG(18:0)/3a-6b-7b-<br>Trihydroxy-5b-cholanoic acid | 0.18  | 0.93 | 0.97 | 3 |
| 228. | PS(18:0)/D-<br>Urobilinogen I-Urobilin              | 0.19  | 0.93 | 0.97 | 1 |
| 229. | LPC(18:3)/D-<br>Urobilinogen I-Urobilin             | 0.19  | 0.93 | 0.97 | 3 |

|      |                                                                                       |       |      |      |   |
|------|---------------------------------------------------------------------------------------|-------|------|------|---|
| 230. | LPC(0:0/18:2)/D-Urobilinogen I-Urobilin                                               | 0.19  | 0.94 | 0.97 | 5 |
| 231. | LPC(18:2/0:0)/D-Urobilinogen I-Urobilin                                               | 0.18  | 0.94 | 0.97 | 5 |
| 232. | Caffeine/LPC(22:5)                                                                    | -0.16 | 0.94 | 0.97 | 4 |
| 233. | Hippuric acid/LPC(22:5)                                                               | -0.19 | 0.94 | 0.97 | 1 |
| 234. | L-Acetylcarnitine/LPC(22:5)                                                           | -0.18 | 0.95 | 0.97 | 6 |
| 235. | Indolelactic acid/LPC(22:5)                                                           | -0.18 | 0.95 | 0.97 | 1 |
| 236. | 1-2-dioleoyl-sn-glycero-3-phosphocholine 1-2-dipetroselenoyl-sn-glycero-3-PC/PC(36:1) | 0.17  | 0.95 | 0.97 | 4 |
| 237. | Indoleacetic acid/PC(2:7)                                                             | 0.16  | 0.95 | 0.97 | 1 |
| 238. | Paraxanthine Theophylline/PC(42:7)                                                    | 0.16  | 0.96 | 0.97 | 3 |
| 239. | L-Tyrosine o-Tyrosine/PC (42:7)                                                       | 0.15  | 0.96 | 0.97 | 2 |
| 240. | Naproxen/PC(42:7)                                                                     | 0.13  | 0.97 | 0.97 | 1 |

|      |                                                        |       |      |      |   |
|------|--------------------------------------------------------|-------|------|------|---|
| 241. | Prostaglandin J2/1-palmitoyl-2-hydroxy-sn-glycero-3-PE | 0.12  | 0.97 | 0.97 | 1 |
| 242. | Caffeine/GCA                                           | -0.10 | 0.97 | 0.97 | 1 |
| 243. | Creatinine/1-Stearoyl-2-Hydroxy-sn-Glycero-3-PE        | 0.15  | 0.97 | 0.97 | 1 |

Table S3: Association with age of molecular feature abundances, correlation and ratios for women and men. Compound names, Winsorized Pearson's correlation coefficient, the *P*-values, the Benjamini-Hochberg adjusted *P*-values, and the number of time that the association with age was validated are given. The correlation with age of abundances, correlation and ratios is given by Equations (6) – (8). An overview of the statistical procedure used to establish such association is given in Figure 2. Abbreviations: LPC = Lysophosphatidylcholine; LPE = lysophosphatidylethanolamine; PC = phosphatidylcholine; PE = phosphatidylethanolamine; MAG = monoacylglycerol; GCA = glycocholic acid; SPM = sphingomyelin.
